# Supplementary material
Source: HighWire-hosted journal article supplement (https://bmjopen.bmj.com/content/11/6/e051706)
Supplement: inline-supplementary-material-1 [file inline-supplementary-material-1.pdf]

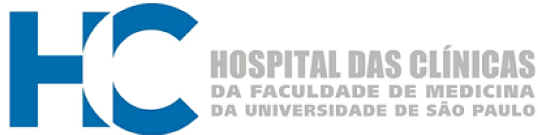

## Post-Acute Sequelae of Sars-CoV-2 (PASC): protocol for a multidisciplinary prospective observational evaluation of a cohort of patients surviving hospitalization in São Paulo, Brazil

### INTERVIEW GUIDES

#### ENFERMAGEM

##### AVALIADOR(A):

Na véspera da data da avaliação, os sujeitos serão contatados pela equipe do projeto por telefone para o acerto dos últimos detalhes sobre sua visita ao HCFMUSP. Neste telefonema, serão feitas perguntas de triagem a fim de que se assegure que nem o paciente nem seu acompanhante estão sintomáticos com suspeita de infecção, seguindo protocolo proposto pela equipe de Moléstias Infecciosas participante do projeto. Durante a sua avaliação inicial, na hipótese remota do paciente apresentar hipertermia ou referir piora do seu estado geral nas últimas 24 horas, direcioná-lo para a sala de isolamento e contatar a equipe administrativa do projeto.

**Data da avaliação**

\*

  Today D-M-Y

**Tempo (dias) da admissão hospitalar até a realização da avaliação**

**Tempo (dias) da ALTA hospitalar até a realização da avaliação**

**Nome do Avaliador (a)**

\*

 ▼

**Temperatura (°C)**

\*

**PA sistólica (mmHg)**

\*

**PA diastólica (mmHg)**

\*

**FC de repouso (bpm)**

**Frequência respiratória de repouso (rpm)**

**Saturação de oxigênio (%)**

**Peso (Kg)**

\*

Usar uma casa decimal, separar por ponto. Não usar vírgula.

**Altura (cm)**

\*

**IMC**

**Circunferência abdominal (cm)**

|                                      |                      |
|--------------------------------------|----------------------|
| <b>Perímetro da panturrilha (cm)</b> | <input type="text"/> |
| <b>Perímetro braquial (cm)</b>       | <input type="text"/> |
|                                      |                      |

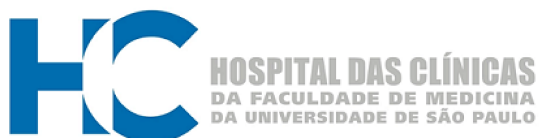

## Post-Acute Sequelae of Sars-CoV-2 (PASC): protocol for a multidisciplinary prospective observational evaluation of a cohort of patients surviving hospitalization in São Paulo, Brazil

### INTERVIEW GUIDES

#### ENTREVISTA MÉDICA PRESENCIAL

Informações complementares sobre Antecedentes Médicos e Comorbidades antes da internação por COVID-19 no HCFMUSP

Data da avaliação

📅 Today D-M-Y

Tempo (dias) da admissão hospitalar até a realização da avaliação

Nome do médico/ avaliador

As perguntas abaixo dizem respeito a comorbidades adicionais que podem não ter sido registradas antes (excluídas neurológicas e psiquiátricas, que serão inquiridas em entrevista separada). Antes de iniciar a entrevista, inspecione o resumo da internação que lhe foi entregue pela equipe administrativa do projeto.

#### Comorbidades documentadas na internação hospitalar

|                                                 |   |                                                                         |   |
|-------------------------------------------------|---|-------------------------------------------------------------------------|---|
| Doença cardíaca crônica (exceto hipertensão):   | — | Hipertensão arterial:                                                   | — |
| Arritmia cardíaca:                              | — | Doença pulmonar crônica:                                                | — |
| Asma:                                           | — | Insuficiência renal crônica dialítica:                                  | — |
| Insuficiência renal (não dialítica):            | — | Doença hepática (leve ou moderada/grave):                               | — |
| AVC ou AIT:                                     | — | Transtorno neurológico crônico:                                         | — |
| Epilepsia:                                      | — | Demência:                                                               | — |
| Doença reumatológica:                           | — | Doença hematológica crônica:                                            | — |
| Doença gastro-intestinal (diverticulite, crôn): | — | Doença psiquiátrica (esquizofrenia, depressão, ansiedade generalizada): | — |
| Doença vascular periférica:                     | — | Transplantado (rim, fígado, coração, pulmão):                           | — |
| Desnutrição:                                    | — | Obesidade:                                                              | — |
| Diabetes:                                       | — | Dislipidemia:                                                           | — |
| TVP/ TEP:                                       | — | Tuberculose (ativa):                                                    | — |
| Tuberculose (anterior):                         | — | Neoplasia maligna:                                                      | — |
| Leucemia/ linfoma/ mieloma:                     | — | Síndrome de Down:                                                       | — |
| Imunodeficiência:                               | — | HIV:                                                                    | — |
| Tabagismo atual:                                | — | Tabagismo prévio:                                                       | — |
| Etilismo:                                       | — |                                                                         |   |
| Número de comorbidades:                         | — | Charlson adaptado:                                                      | — |

Antes da internação no Hospital das Clínicas por COVID-19, alguma vez um médico lhe informou que o (a) senhor(a) teve ou tem alguma destas outras doenças?

#### 1. Infarto do miocárdio ("ataque do coração")

Sim  Não  Não sabe/ não quer responder

reset

Verificar se houve confirmação do diagnóstico por eletrocardiograma e/ou alterações de enzimas

**2. Angina de peito ("dor no peito ou isquemia ou má circulação no coração")**

Sim  Não  Não sabe/não quer responder

[reset](#)**3. O(A) senhor(a) já foi submetido à cirurgia de ponte de safena ou de artéria mamária ou angioplastia ou implantação de stent no coração?**

Sim  Não  Não sabe/não quer responder

[reset](#)**4. Insuficiência cardíaca ("coração grande ou dilatado")**

Sim  Não  Não sabe/não quer responder

[reset](#)**5. Febre reumática ("reumatismo com problema no coração, válvula entupida, sopro no coração que exige controle médico")**

Sim  Não  Não sabe/não quer responder

[reset](#)**6. Doença de Chagas**

Sim  Não  Não sabe/não quer responder

[reset](#)**7. Esteatose ("gordura no fígado")**

Sim  Não  Não sabe/não quer responder

[reset](#)**8. Outra doença do fígado ("hepatite crônica ou cirrose")**

Sim  Não  Não sabe/não quer responder

[reset](#)**9. História de tratamento de úlcera do estômago ou do duodeno**

Sim  Não  Não sabe/não quer responder

[reset](#)**10. História de sangramento de úlcera do estômago ou do duodeno ("presença de sangue vermelho nas fezes, ou sangue velho, escurecido")**

Sim  Não  Não sabe/não quer responder

[reset](#)**11. Artrite reumatóide, lúpus eritematoso, reumatismo, artrose, artrite ou outro "problema nas articulações (juntas)"**

Sim  Não  Não sabe/não quer responder

[reset](#)**12. Apneia do sono ("excesso de roncos durante a noite, sonolência diurna, diagnosticada com um exame do sono")**

Sim  Não  Não sabe/não quer responder

[reset](#)**13. Entrevistador: confirmar se havia algum diagnóstico doença vascular periférica antes da internação por COVID-19****13.a. Presença de claudicação intermitente ("dor que parece câibra na perna, quando você está caminhando e que melhora quando você para de andar") e/ou história de cirurgia para insuficiência arterial crônica?**

Sim  Não  Não sabe/não quer responder

[reset](#)**13.b. História de gangrena ou insuficiência arterial aguda ("episódio de dor intensa, frio, palidez e falta de sensibilidade ou formigamento de uma perna ou braço, com ausência de pulso, para qual é necessário fazer pequena cirurgia com cateter para desentupir a artéria")?**

Sim  Não  Não sabe/não quer responder

[reset](#)**13.c. História de aneurisma torácico ou abdominal (>6 cm) não tratado?**

Sim  Não  Não sabe/não quer responder

[reset](#)

**13.d. História de trombose ("problema nas veias com formação de coágulos no sangue, que em geral é confirmado com exame de ultrassom da veia")?**

Sim  Não  Não sabe/não quer responder

reset

**14. Diagnóstico de doença renal crônica**

Sim  Não  Não sabe/não quer responder

reset

**15. O paciente tem diabetes?**

Sim  Não  Não sabe/não quer responder

reset

**Entrevistador(a):** no espaço abaixo, você pode registrar **informações adicionais sobre as doenças progressivas investigadas acima** (ou outras comorbidades que o participante tenha mencionado) mas que você está em dúvida sobre o local mais adequado para registrá-las. Não esqueça de perguntar também a idade do participante ao primeiro diagnóstico médico.

Expand

#### SAÚDE ATUAL - SINTOMAS MÉDICOS APÓS A ALTA ATÉ A PRESENTE DATA

#### **1. Sintomas gerais após a alta e sintomas relacionados a novos quadros infecciosos**

##### **PERGUNTAR AO PACIENTE / ACOMPANHANTE:**

**Você se recuperou dos principais sintomas da doença após a internação?**

Não  Sim  Parcialmente  Não sabe/não quer responder

reset

**Como você considera a sua saúde geral?**

Muito ruim  Ruim  Razoável  Boa  Muito boa

reset

**O(a) senhor(a) tem sentido dor ou desconforto no peito (tórax)?**

Sim  Não  Não sabe/não quer responder

reset

**Antes da internação por COVID-19, o(a) senhor(a) conseguia subir um lance de escadas de 8 degraus carregando peso ( $\pm$  10Kg) ou caminhar rápido no terreno plano ou subir ladeiras sem ter que parar por cansaço ou falta de ar?**

Sim  Não  Não sabe/não quer responder

reset

**Antes da internação por COVID-19, o(a) senhor(a) conseguia caminhar devagar no terreno plano ou arrumar a casa ou tomar banho sem ter que parar por cansaço ou falta de ar?**

Sim  Não  Não sabe/não quer responder

reset

**Antes da internação por COVID-19, o(a) senhor(a) tinha cansaço ou falta de ar quando estava comendo, sentado ou deitado?**

Sim  Não  Não sabe/não quer responder

reset

#### **Clinical Frailty Scale - Escala Clínica de Fragilidade**

**Baseado na escala abaixo indique o número que indica o grau de fragilidade do paciente hoje.**

1  2  3  4  5  6  7  8  9

reset

**Baseado na escala abaixo indique o número que indica o grau de fragilidade do paciente antes da internação por COVID-19**

1  2  3  4  5  6  7  8  9

reset

#### **Clinical Frailty Scale - Escala Clínica de Fragilidade**

**Você teve tosse desde que recebeu alta da sua internação?**

Sim  Não  Não sabe/não quer responder

[reset](#)

**Você teve diarreia desde que recebeu alta da sua internação?**

Sim  Não  Não sabe/não quer responder

[reset](#)

**Você teve dores no corpo desde que recebeu alta da sua internação?**

Sim  Não  Não sabe/não quer responder

[reset](#)

**Foram diagnosticadas infecções (incluindo respiratórias) após a internação? ("por exemplo com sintomas de febre, dor de garganta, tosse, nariz entupido ou escorrendo, diarreia, dores no corpo, taquicardia - batadeira no coração")**

Sim  Não  Não sabe/não quer responder

[reset](#)

**Em caso de infecção respiratória, houve necessidade de antibioticoterapia?**

Sim  Não  Não sabe/não quer responder

[reset](#)

**Nos últimos 6 meses, você foi atendido em um pronto atendimento (pronto socorro) e/ou ficou internado em um hospital ou unidade de pronto atendimento por mais de 24 horas consecutivas?**

- Não realizou visitas ao pronto atendimento (PA) nem esteve internado nos últimos 6 meses  
 Fez apenas visitas ao PA (independe do número de vezes)  
 Teve internação (permanência maior ou igual a 24 horas consecutivas) nos últimos 6 meses

[reset](#)

**Uso de oxigenoterapia em domicílio atualmente?**

Sim  Não  Não sabe/não quer responder

[reset](#)

**Foi diagnosticada alguma forma de neoplasia (câncer) após a internação?**

Sim  Não  Não sabe/não quer responder

[reset](#)

**Surgiram alterações metabólicas após a internação?**

Sim  Não  Não sabe/não quer responder

[reset](#)

**Você teve dores articulares ("nas juntas") desde que recebeu alta da sua internação?**

Sim  Não  Não sabe/não quer responder

[reset](#)

**Você teve náuseas e vômitos que duraram mais do que 2 semanas desde que recebeu alta da sua internação?**

Sim  Não  Não sabe/não quer responder

[reset](#)

**Você teve dores abdominais ou prisão de ventre ("intestino preso") desde que recebeu alta da sua internação?**

Sim  Não  Não sabe/não quer responder

[reset](#)

**Surgiu algum problema de pele ("manchas, vermelhidão, feridas") desde que recebeu alta da sua internação?**

Sim  Não  Não sabe/não quer responder

[reset](#)

**Surgiu algum problema de cabelo ("por exemplo queda de cabelo, cabelos mais quebradiços, etc") desde que recebeu alta da sua internação?**

Sim  Não  Não sabe/não quer responder

[reset](#)

**Entrevistador(a):** no espaço abaixo, registrar informações adicionais sobre aspectos de saúde gerais desde a alta hospitalar e quadros infecciosos que não tenham sido contempladas nas questões acima.

[Expand](#)

**2. Vascular / Hematologia**

**Ocorrência de trombose venosa profunda após a alta? (problema nas veias com formação de coágulos no sangue, que em geral é confirmado com exame de ultrassom da veia)**

Sim  Não  Não sabe/não quer responder

[reset](#)

**O paciente relata aparecimento de gânglios hoje? ("sente por exemplo no pescoço, virilha, axila?")**

Sim  Não  Não sabe/não quer responder

[reset](#)

**Ocorrência de quedas da própria altura após a alta? ("desmaio de repente, ou cair por perda de equilíbrio")**

Sim  Não  Não sabe/não quer responder

[reset](#)

**Foi diagnosticada hipertensão arterial ("pressão alta") pela primeira vez após a internação?**

Sim  Não  Não sabe/não quer responder

[reset](#)

**Houve outras complicações cardiovasculares após a internação? ("algum médico disse que você teve depois da alta problemas do coração do tipo infarto, miocardite, ou pericardite?")**

Sim  Não  Não sabe/não quer responder

[reset](#)

**Entrevistador(a):** no espaço abaixo, registrar informações adicionais sobre sintomas apresentados pelo paciente após a internação por COVID-19 que não tenham sido contempladas nas questões acima.

[Expand](#)**3. Nefrologia**

**Houve aparecimento ou piora de noctúria ("vontade de urinar várias vezes durante a noite") após a internação?**

Sim  Não  Não sabe/não quer responder

[reset](#)

**Houve aparecimento ou piora de urina espumosa após a internação?**

Sim  Não  Não sabe/não quer responder

[reset](#)

**Houve aparecimento ou piora de urina avermelhada após a internação?**

Sim  Não  Não sabe/não quer responder

[reset](#)

**Houve aparecimento de edema ("inchaço em alguma parte do corpo") após a internação?**

Sim  Não  Não sabe/não quer responder

[reset](#)

**Entrevistador(a):** no espaço abaixo, registrar informações adicionais sobre sintomas apresentados pelo paciente após a internação por COVID-19 que não tenham sido contempladas nas questões acima.

[Expand](#)**Questionário de sintomas do trato urinário inferior (IPSS)**

|                                                                                                                                          |                                                                                                                                                                                                                                                                     |                       |
|------------------------------------------------------------------------------------------------------------------------------------------|---------------------------------------------------------------------------------------------------------------------------------------------------------------------------------------------------------------------------------------------------------------------|-----------------------|
| <b>Durante o último mês, com que frequência você teve a sensação de que a sua bexiga não esvaziou completamente depois de urinar?</b>    | <input type="radio"/> Nunca<br><input type="radio"/> Raramente<br><input type="radio"/> Às vezes<br><input type="radio"/> Frequentemente<br><input type="radio"/> Quase sempre                                                                                      | <a href="#">reset</a> |
| <b>Durante o último mês, com que frequência você teve que urinar novamente menos de 2 horas após ter urinado?</b>                        | <input type="radio"/> Nunca<br><input type="radio"/> Raramente<br><input type="radio"/> Às vezes<br><input type="radio"/> Frequentemente<br><input type="radio"/> Quase sempre                                                                                      | <a href="#">reset</a> |
| <b>Durante o último mês, com que frequência você notou que o jato de urina parou e recomeçou algumas vezes enquanto estava urinando?</b> | <input type="radio"/> Nunca<br><input type="radio"/> Raramente<br><input type="radio"/> Às vezes<br><input type="radio"/> Frequentemente<br><input type="radio"/> Quase sempre                                                                                      | <a href="#">reset</a> |
| <b>Durante o último mês, com que frequência você observou que foi difícil segurar a urina?</b>                                           | <input type="radio"/> Nunca<br><input type="radio"/> Raramente<br><input type="radio"/> Às vezes<br><input type="radio"/> Frequentemente<br><input type="radio"/> Quase sempre                                                                                      | <a href="#">reset</a> |
| <b>Durante o último mês, com que frequência você notou que teve um jato de urina fraco?</b>                                              | <input type="radio"/> Nunca<br><input type="radio"/> Raramente<br><input type="radio"/> Às vezes<br><input type="radio"/> Frequentemente<br><input type="radio"/> Quase sempre                                                                                      | <a href="#">reset</a> |
| <b>Durante o último mês, com que frequência você teve que fazer força para começar a urinar?</b>                                         | <input type="radio"/> Nunca<br><input type="radio"/> Raramente<br><input type="radio"/> Às vezes<br><input type="radio"/> Frequentemente<br><input type="radio"/> Quase sempre                                                                                      | <a href="#">reset</a> |
| <b>Durante o último mês, quantas vezes em média você teve que levantar da cama à noite para urinar?</b>                                  | <input type="radio"/> Nenhuma<br><input type="radio"/> Uma<br><input type="radio"/> Duas<br><input type="radio"/> Três<br><input type="radio"/> Quatro                                                                                                              | <a href="#">reset</a> |
| <b>Se você tivesse que viver o resto da sua vida com os sintomas urinários que você tem atualmente, como se sentiria?</b>                | <input type="radio"/> Feliz<br><input type="radio"/> Muito satisfeito<br><input type="radio"/> Satisfeito<br><input type="radio"/> Mais ou menos<br><input type="radio"/> Insatisfeito<br><input type="radio"/> Muito insatisfeito<br><input type="radio"/> Infeliz | <a href="#">reset</a> |
| <b>Em comparação com os meses antes de você ter tido a COVID-19, seus sintomas urinários atuais:</b>                                     | <input type="radio"/> Melhoraram<br><input type="radio"/> Permaneceram os mesmos<br><input type="radio"/> Pioraram<br><input type="radio"/> Não sabe / não quer responder                                                                                           | <a href="#">reset</a> |

#### 4. Otorrinolaringologia

##### Sintomas otológicos



|                                                                                               |                                                                                                                                                                                                                                                                                            |                        |
|-----------------------------------------------------------------------------------------------|--------------------------------------------------------------------------------------------------------------------------------------------------------------------------------------------------------------------------------------------------------------------------------------------|------------------------|
| <b>Você percebia perda de audição antes da Covid-19?</b>                                      | <input type="radio"/> Sim, no ouvido direito<br><input type="radio"/> Sim, no ouvido esquerdo<br><input type="radio"/> Sim, nos dois ouvidos<br><input type="radio"/> Não percebia perda de audição                                                                                        | <a href="#">reset</a>  |
| <b>Você percebeu surgimento ou piora de perda de audição após a internação por Covid-19?</b>  | <input type="radio"/> Sim, no ouvido direito<br><input type="radio"/> Sim, no ouvido esquerdo<br><input type="radio"/> Sim, nos dois ouvidos<br><input type="radio"/> Não percebi surgimento ou piora da perda de audição                                                                  | <a href="#">reset</a>  |
| <b>Você percebia zumbido antes da COVID-19?</b>                                               | <input type="radio"/> Sim, no ouvido direito<br><input type="radio"/> Sim, no ouvido esquerdo<br><input type="radio"/> Sim, nos dois ouvidos<br><input type="radio"/> Sim, na cabeça<br><input type="radio"/> Não percebia zumbido                                                         | <a href="#">reset</a>  |
| <b>Você percebeu surgimento ou piora do zumbido após a internação por Covid-19?</b>           | <input type="radio"/> Sim, no ouvido direito<br><input type="radio"/> Sim, no ouvido esquerdo<br><input type="radio"/> Sim, nos dois ouvidos<br><input type="radio"/> Sim, na cabeça<br><input type="radio"/> Não percebi surgimento ou piora do zumbido após a Covid-19                   | <a href="#">reset</a>  |
| <b>Você percebia tontura antes da Covid-19</b>                                                | <input type="radio"/> Não <input type="radio"/> Sim                                                                                                                                                                                                                                        | <a href="#">reset</a>  |
| <b>Você percebeu surgimento ou agravamento da tontura relacionada à Covid-19?</b>             | <input type="radio"/> Sim, tipo giratória<br><input type="radio"/> Sim, tipo desequilíbrio<br><input type="radio"/> Sim, tipo desmaio<br><input type="radio"/> Sim, outro tipo<br><input type="radio"/> Não percebi surgimento ou piora da tontura relacionada à Covid-19                  | <a href="#">reset</a>  |
| <b>Sintomas nasais</b>                                                                        |                                                                                                                                                                                                                                                                                            |                        |
| <b>Você tem rinossinusite crônica?</b>                                                        | <input type="radio"/> Sim <input type="radio"/> Não <input type="radio"/> Não sabe/não quer responder                                                                                                                                                                                      | <a href="#">reset</a>  |
| <b>Outras observações sobre antecedentes de sintomas nasais</b>                               | <div style="border: 1px solid #ccc; height: 40px; width: 100%;"></div>                                                                                                                                                                                                                     | <a href="#">Expand</a> |
| <b>Olfato e paladar</b>                                                                       |                                                                                                                                                                                                                                                                                            |                        |
| <b>Você sentia "dificuldade para sentir cheiro" / identificar odores antes da COVID-19?</b>   | <input type="radio"/> Sim <input type="radio"/> Não <input type="radio"/> Não sabe/não quer responder                                                                                                                                                                                      | <a href="#">reset</a>  |
| <b>Avalie sua capacidade de sentir cheiros DURANTE sua doença respiratória pela COVID-19:</b> | 0 - Sem olfato/cheiro <span style="margin-left: 200px;">5</span> <span style="float: right;">10- Excelente</span><br><div style="text-align: center;"><input type="range" value="5"/></div> <p style="text-align: center; font-size: small;">Change the slider above to set a response</p> | <a href="#">reset</a>  |
| <b>Você tinha dificuldades para sentir o gosto das coisas antes da COVID-19?</b>              | <input type="radio"/> Sim <input type="radio"/> Não <input type="radio"/> Não sabe/não quer responder                                                                                                                                                                                      | <a href="#">reset</a>  |

**Avalie sua capacidade de sentir o paladar DURANTE sua doença respiratória pela COVID-19:**

0 - Sem paladar/gosto 5 10 - Excelente



Change the slider above to set a response

[reset](#)**Avalie sua capacidade atual de sentir cheiros:**

0 - Sem olfato/cheiro 5 10 - Excelente



Change the slider above to set a response

[reset](#)**Você teve alguma das seguintes alterações no olfato/cheiro depois da sua doença respiratória pela COVID-19? (Selecione tudo que se aplica)**

- Não consigo cheirar nada / Os cheiros são menos fortes do que eram antes
- Os cheiros são diferentes do que antes (a qualidade do cheiro mudou)
- Sinto o cheiro de coisas que não estão próximas (por exemplo, sinto o cheiro de queimado quando nada está pegando fogo)
- O olfato/cheiro flutua (vai e vem)
- Não tive nenhuma alteração

**Numa escala de ZERO (nenhum incômodo) a DEZ (muito incômodo) qual o seu grau de incômodo por não sentir cheiros?**

0 - Nenhum incômodo 5 10 - Muito incômodo



Change the slider above to set a response

[reset](#)**Avalie sua capacidade atual de sentir o paladar:**

0 - Sem paladar/gosto 5 10 - Excelente



Change the slider above to set a response

[reset](#)**Você consegue diferenciar entre sabores doces, salgados, azedos e amargos?**

- Sim  Não  Não sabe/não quer responder

[reset](#)**Numa escala de ZERO (nenhum incômodo) a DEZ (muito incômodo) qual o seu grau de incômodo por não perceber o paladar?**

0 - Nenhum incômodo 5 10 - Muito incômodo



Change the slider above to set a response

[reset](#)**RASPADINHA DO CORONA**

Por favor, selecionar a opção correspondente ao que você SENTIR, de acordo com o número da raspadinha.

**Raspadinha 1**

- Sem cheiro  Uva  Hortelã  Abóbora  Manga

[reset](#)**Raspadinha 2**

- Sem cheiro  Limão  Café  Bacon  Rosas

[reset](#)**Raspadinha 3**

- Sem cheiro  Pipoca  Pêssego  Canela  Banana

[reset](#)

**Raspadinha 4**

Sem cheiro  Lavanda  Cereja  Melancia  Queijo

[reset](#)**Raspadinha 5**

Sem cheiro  Bacon  Manga  Chocolate  Café

[reset](#)

Número de acertos da raspadinha

## Screening para Sintomas de Obstrução Nasal relacionados à COVID-19

Você teve sintomas nasais durante a COVID-19?

Não  Sim  Não sabe/ não quer responder

[reset](#)**IMPACTO DE SINTOMAS NASAIS SOBRE QUALIDADE DE VIDA NO ÚLTIMO MÊS**

Pedimos que nos ajude a compreender melhor o impacto da obstrução nasal em sua qualidade de vida. Durante o último mês, qual foi a intensidade em que as situações abaixo foram um problema para você?

|                                                                                 | Não é um problema     | Problema muito pequeno | Problema moderado     | Problema razoavelmente grave | Problema grave        |
|---------------------------------------------------------------------------------|-----------------------|------------------------|-----------------------|------------------------------|-----------------------|
| Congestão nasal ou "sensação de nariz cheio"                                    | <input type="radio"/> | <input type="radio"/>  | <input type="radio"/> | <input type="radio"/>        | <input type="radio"/> |
|                                                                                 |                       |                        |                       |                              | <a href="#">reset</a> |
| Bloqueio ou obstrução nasal                                                     | <input type="radio"/> | <input type="radio"/>  | <input type="radio"/> | <input type="radio"/>        | <input type="radio"/> |
|                                                                                 |                       |                        |                       |                              | <a href="#">reset</a> |
| Dificuldade para respirar pelo nariz                                            | <input type="radio"/> | <input type="radio"/>  | <input type="radio"/> | <input type="radio"/>        | <input type="radio"/> |
|                                                                                 |                       |                        |                       |                              | <a href="#">reset</a> |
| Dificuldade para dormir (por causa de obstrução nasal)                          | <input type="radio"/> | <input type="radio"/>  | <input type="radio"/> | <input type="radio"/>        | <input type="radio"/> |
|                                                                                 |                       |                        |                       |                              | <a href="#">reset</a> |
| Incapaz de respirar o suficiente pelo nariz durante exercício físico ou esforço | <input type="radio"/> | <input type="radio"/>  | <input type="radio"/> | <input type="radio"/>        | <input type="radio"/> |
|                                                                                 |                       |                        |                       |                              | <a href="#">reset</a> |

## USO DE MEDICAMENTOS

**Medicamentos de uso crônico**

|                                                 | Sim                   | Não                   | Desconhecido          |
|-------------------------------------------------|-----------------------|-----------------------|-----------------------|
| Inibidores da enzima conversora de angiotensina | <input type="radio"/> | <input type="radio"/> | <input type="radio"/> |
|                                                 |                       |                       | <a href="#">reset</a> |
| Antagonista do receptor da angiotensina II      | <input type="radio"/> | <input type="radio"/> | <input type="radio"/> |
|                                                 |                       |                       | <a href="#">reset</a> |
| Antiinflamatório não-esteróide (NSAID)          | <input type="radio"/> | <input type="radio"/> | <input type="radio"/> |
|                                                 |                       |                       | <a href="#">reset</a> |
| Corticosteróides sistêmicos                     | <input type="radio"/> | <input type="radio"/> | <input type="radio"/> |
|                                                 |                       |                       | <a href="#">reset</a> |
| Cloroquina/ hidroxiclороquina                   | <input type="radio"/> | <input type="radio"/> | <input type="radio"/> |
|                                                 |                       |                       | <a href="#">reset</a> |
| Antiretroviral                                  | <input type="radio"/> | <input type="radio"/> | <input type="radio"/> |
|                                                 |                       |                       | <a href="#">reset</a> |
| Anticoagulantes orais                           | <input type="radio"/> | <input type="radio"/> | <input type="radio"/> |
|                                                 |                       |                       | <a href="#">reset</a> |
| Estatinas                                       | <input type="radio"/> | <input type="radio"/> | <input type="radio"/> |
|                                                 |                       |                       | <a href="#">reset</a> |
| Inibidores da bomba de próton                   | <input type="radio"/> | <input type="radio"/> | <input type="radio"/> |
|                                                 |                       |                       | <a href="#">reset</a> |
| Imunobiológico (Rituximab, tocilizumab)         | <input type="radio"/> | <input type="radio"/> | <input type="radio"/> |
|                                                 |                       |                       | <a href="#">reset</a> |
| Imunossuppressores (Tracrolimus, azatríprina)   | <input type="radio"/> | <input type="radio"/> | <input type="radio"/> |
|                                                 |                       |                       | <a href="#">reset</a> |

Antiviral (Ribavirin, lopinavir, ritonavir, interferon)

[reset](#)

**Entrevistador(a):** no momento da entrevista, você á vai estar de posse das prescrições de uso regular do paciente, colhidas pela equipe administrativa do projeto. No espaço abaixo, registre quaisquer informações adicionais sobre medicações de uso regular que julgue pertinentes.

[Expand](#)

**Entrevistador(a):** MEDICAMENTOS DE USO **ESPORÁDICO** UTILIZADOS NAS **ÚLTIMAS DUAS SEMANAS**.

[Expand](#)

**Entrevistador(a):** no espaço abaixo, registrar informações adicionais sobre medicações de uso esporádico

[Expand](#)

#### EXAME FÍSICO MÉDICO (RESUMIDO)

**Ausulta Pulmonar**

Normal  Alterada

[reset](#)

**Ausulta cardíaca (descrever apenas achados relevantes):**

[Expand](#)

**Gânglios: avaliar linfonodos em região axilar, cervical e inguinal, e/ou presença de linfonodos sensíveis em outras regiões.**

**Gânglios - Localização**

Não possui  Axilar  Inguinal  Cervical  Outras localizações

**Campo de texto para descrever sucintamente: (a) consistência: amolecido (insignificante), fibroelástico / consistência "borracha" (classicamente linfoma), endurecido (classicamente malignidade e infecção granulomatosa); e (b) presença de dor à palpação**

[Expand](#)

**Edema articulação**

Normal  Leve  Moderada  Grave

[reset](#)

**Avaliador(a): no espaço abaixo, registrar quaisquer outras informações relativas ao exame físico que sejam dignas de nota.**

Expand

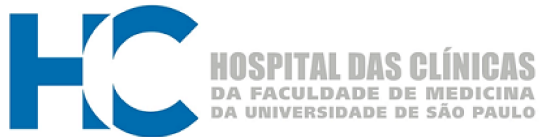

## Post-Acute Sequelae of Sars-CoV-2 (PASC): protocol for a multidisciplinary prospective observational evaluation of a cohort of patients surviving hospitalization in São Paulo, Brazil

### INTERVIEW GUIDES

#### FUNCIONALIDADE

##### Dados Gerais

|                                                                          |                                                                                                                                                                                                                          |
|--------------------------------------------------------------------------|--------------------------------------------------------------------------------------------------------------------------------------------------------------------------------------------------------------------------|
| <b>Data da avaliação</b>                                                 | <input type="text"/>  Today D-M-Y                                                                                                       |
| <b>Tempo (dias) da admissão hospitalar até a realização da avaliação</b> | <input type="text"/>                                                                                                                                                                                                     |
| <b>Nome do avaliador (a)</b>                                             | <input type="text"/>                                                                                                                                                                                                     |
| <b>Estado geral de saúde</b>                                             | <input type="radio"/> BEG <input type="radio"/> REG <input type="radio"/> MEG <a href="#">reset</a>                                                                                                                      |
| <b>Uso de meio auxiliar</b>                                              | <input type="radio"/> Independente <input type="radio"/> Muletas <input type="radio"/> Bengala <input type="radio"/> Andador <input type="radio"/> Cadeira de rodas <input type="radio"/> Terceiro <a href="#">reset</a> |
| <b>Cuidador/acompanhante?</b>                                            | <input type="radio"/> Sim <input type="radio"/> Não <a href="#">reset</a>                                                                                                                                                |

##### 1. EQ5D-L5

Para cada pergunta, por favor clique na OPÇÃO que melhor descreve sua saúde HOJE.

#### Mobilidade

- Não tenho problemas em andar
  - Tenho problemas leves em andar
  - Tenho problemas moderados em andar
  - Tenho problemas graves em andar
  - Sou incapaz de andar
- [reset](#)

#### Cuidados Pessoais

- Não tenho problemas para me lavar ou me vestir
  - Tenho problemas leves para me lavar ou me vestir
  - Tenho problemas moderados para me lavar ou me vestir
  - Tenho problemas graves para me lavar ou me vestir
  - Sou incapaz de me lavar ou vestir sozinho/a
- [reset](#)

#### Atividades Habituais (ex. trabalho, estudos, atividades domésticas, atividades em família ou de lazer)

- Não tenho problemas em realizar as minhas atividades habituais
  - Tenho problemas leves em realizar as minhas atividades habituais
  - Tenho problemas moderados em realizar as minhas atividades habituais
  - Tenho problemas graves em realizar as minhas atividades habituais
  - Sou incapaz de realizar as minhas atividades habituais
- [reset](#)

**Dor / Mal Estar**

- Não tenho dores ou mal-estar  
 Tenho dores ou mal-estar leves  
 Tenho dores ou mal-estar moderados  
 Tenho dores ou mal-estar fortes  
 Tenho dores ou mal-estar extremos

reset

**Ansiedade / Depressão**

- Não estou ansioso/a ou deprimido/a  
 Estou levemente ansioso/a ou deprimido/a  
 Estou moderadamente ansioso/a ou deprimido/a  
 Estou muito ansioso/a ou deprimido/a  
 Estou extremamente ansioso/a ou deprimido/a

reset

- Nós gostaríamos de saber o quão boa ou ruim a sua saúde está HOJE.

- Esta escala é numerada de 0 a 100.

- 100 significa a **MELHOR** saúde que você possa imaginar.  
 0 significa a **PIOR** saúde que você possa imaginar.

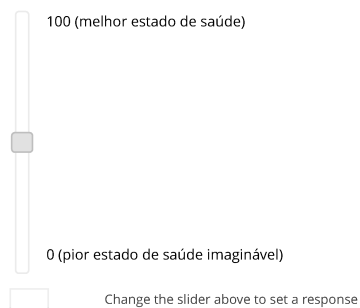

reset

- Por favor arraste o botão da escala para indicar como a sua saúde está HOJE.

© EuroQol Research Foundation. EQ-5D™ is a trade mark of the EuroQol Research Foundation

## 2. World Health Organization Disability Assessment Schedule (WHODAS) 2.0

Este questionário pergunta sobre dificuldades decorrentes de condições de saúde. Condições de saúde incluem doenças ou enfermidades, outros problemas de saúde de curta ou longa duração, lesões, problemas mentais ou emocionais, e problemas com álcool ou drogas. Pense nos últimos 30 dias e responda as questões, pensando sobre quanta dificuldade você tem nas atividades a seguir. Para cada questão, por favor, marque uma resposta.

**Nos últimos 30 dias, quanta dificuldade você teve em:**

**Ficar em pé por longos períodos como 30 minutos?**

- Nenhuma  Leve  Moderada  Grave  Extrema ou não consegue fazer

reset

**Cuidar das suas responsabilidades domésticas?**

- Nenhuma  Leve  Moderada  Grave  Extrema ou não consegue fazer

reset

**Aprender uma nova tarefa, por exemplo, como chegar a um lugar desconhecido?**

- Nenhuma  Leve  Moderada  Grave  Extrema ou não consegue fazer

reset

**Quanta dificuldade você teve ao participar em atividades comunitárias (por exemplo, festividades, atividades religiosas ou outra atividade) do mesmo modo que qualquer outra pessoa?**

- Nenhuma  Leve  Moderada  Grave  Extrema ou não consegue fazer

reset

**Quanto você tem sido emocionalmente afetado por seus problemas de saúde?**

- Nenhuma  Leve  Moderada  Grave  Extrema ou não consegue fazer

reset

**Concentrar-se para fazer alguma coisa durante dez minutos?**

Nenhuma  Leve  Moderada  Grave  Extrema ou não consegue fazer

[reset](#)**Andar por longas distâncias como por 1 quilômetro?**

Nenhuma  Leve  Moderada  Grave  Extrema ou não consegue fazer

[reset](#)**Lavar seu corpo inteiro?**

Nenhuma  Leve  Moderada  Grave  Extrema ou não consegue fazer

[reset](#)**Vestir-se?**

Nenhuma  Leve  Moderada  Grave  Extrema ou não consegue fazer

[reset](#)**Lidar com pessoas que você não conhece?**

Nenhuma  Leve  Moderada  Grave  Extrema ou não consegue fazer

[reset](#)**Manter uma amizade?**

Nenhuma  Leve  Moderada  Grave  Extrema ou não consegue fazer

[reset](#)**Seu dia-a-dia no trabalho?**

Nenhuma  Leve  Moderada  Grave  Extrema ou não consegue fazer

[reset](#)**Whodas - Score (pontuação simples)****Em geral, nos últimos 30 dias, por quantos dias essas dificuldades estiveram presentes?****Nos últimos 30 dias, por quantos dias você esteve completamente incapaz de executar suas atividades usuais ou de trabalho por causa da sua condição de saúde?****Nos últimos 30 dias, sem contar os dias que você esteve totalmente incapaz, por quantos dias você diminuiu ou reduziu suas atividades usuais ou de trabalho por causa de alguma condição de saúde?****3. Post-COVID-19 Functional Status (PCFS) scale****Quanto você está atualmente afetado(a) na sua vida diária por causa da COVID-19? (Por favor indique qual das seguintes sentenças mais se aplica a você).**

- Eu não tenho limitação nas minhas atividades diárias (no meu dia a dia) nem sintomas como dor, depressão ou ansiedade relacionados à infecção.
- Eu tenho limitações mínimas nas minhas atividades diárias (no meu dia a dia) mas eu consigo realizar todas as tarefas/atividades habituais, embora eu ainda tenha sintomas persistentes como dor, depressão ou ansiedade.
- Eu tenho limitações nas minhas atividades diárias (no meu dia a dia) e eu de vez em quando necessito evitar ou reduzir atividades / trabalho ou demoro mais tempo para fazê-las por causa dos sintomas persistentes como dor, depressão ou ansiedade. Porém, sou capaz de fazer todas as atividades sem qualquer assistência
- Eu tenho limitações nas minhas atividades diárias (no meu dia a dia) e não sou capaz de realizar todas as tarefas / atividades habituais devido a sintomas, dor, depressão ou ansiedade. Porém, eu sou capaz de cuidar de mim mesmo sem qualquer ajuda.
- Eu tenho limitações graves nas minhas atividades diárias (no meu dia a dia): Eu não sou capaz de cuidar de mim e, portanto, eu sou dependente de outras pessoas para cuidar de mim devido a sintomas, dor, depressão ou ansiedade

[reset](#)**PCFS - Score**



## 4. Escala de Fadiga FACIT

Abaixo você encontrará uma lista de afirmações que outras pessoas com a sua doença disseram ser importante. Por favor, circunde ou marque um número em cada uma das linhas para indicar a resposta que melhor corresponde ao seu estado durante os últimos 7 dias.

0 - Nem um pouco; 1 - Um pouco; 2 - Mais ou menos; 3 - Muito; 4 - MUITÍSSIMO

**Sinto-me fatigado(a)**

0- Nem um pouco  1- Um pouco  2- Mais ou menos  3- Muito  4- MUITÍSSIMO

[reset](#)**Sinto fraqueza generalizada**

0- Nem um pouco  1- Um pouco  2- Mais ou menos  3- Muito  4- MUITÍSSIMO

[reset](#)**Sinto-me sem forças**

0- Nem um pouco  1- Um pouco  2- Mais ou menos  3- Muito  4- MUITÍSSIMO

[reset](#)**Sinto-me cansado**

0- Nem um pouco  1- Um pouco  2- Mais ou menos  3- Muito  4- MUITÍSSIMO

[reset](#)**Tenho dificuldade em começar as coisas porque estou cansado(a)**

0- Nem um pouco  1- Um pouco  2- Mais ou menos  3- Muito  4- MUITÍSSIMO

[reset](#)**Tenho dificuldade em terminar as coisas porque estou cansado(a)**

0- Nem um pouco  1- Um pouco  2- Mais ou menos  3- Muito  4- MUITÍSSIMO

[reset](#)**Tenho energia**

0- Nem um pouco  1- Um pouco  2- Mais ou menos  3- Muito  4- MUITÍSSIMO

[reset](#)**Sou capaz de fazer as minhas atividades normais**

0- Nem um pouco  1- Um pouco  2- Mais ou menos  3- Muito  4- MUITÍSSIMO

[reset](#)**Preciso de dormir durante do dia**

0- Nem um pouco  1- Um pouco  2- Mais ou menos  3- Muito  4- MUITÍSSIMO

[reset](#)**Estou cansado(a) demais para comer**

0- Nem um pouco  1- Um pouco  2- Mais ou menos  3- Muito  4- MUITÍSSIMO

[reset](#)**Preciso de ajuda para as minhas atividades normais**

0- Nem um pouco  1- Um pouco  2- Mais ou menos  3- Muito  4- MUITÍSSIMO

[reset](#)**Estou frustrado(a) por estar cansado(a) demais para fazer as coisas que quero**

0- Nem um pouco  1- Um pouco  2- Mais ou menos  3- Muito  4- MUITÍSSIMO

[reset](#)**Tenho de limitar a minha vida social por estar cansado(a)**

0- Nem um pouco  1- Um pouco  2- Mais ou menos  3- Muito  4- MUITÍSSIMO

[reset](#)**FACIT-F - Escore Total**

## 5. Avaliação de Dispneia - Escal MRC

Baseado na escala abaixo indique o número que indica seu grau de falta de ar HOJE.

- Tenho falta de ar ao realizar exercício intenso.
- Tenho falta de ar quando apresso o meu passo, ou subo escadas ou ladeira.
- Preciso parar algumas vezes quando ando no meu passo, ou ando mais devagar que outras pessoas de minha idade.
- Preciso parar muitas vezes devido à falta de ar quando ando perto de 100 metros, ou poucos minutos de caminhada no plano.
- Sinto tanta falta de ar que não saio de casa, ou preciso de ajuda para me vestir ou tomar banho sozinho.

[reset](#)

Dispneia - Escore

### 6. Força muscular (Escala MRC)

Avaliar cada um dos grupos musculares:

|                                        | Paralisia completa    | Mínima contração      | Ausência de movimentos ativos contra a gravidade | Contração fraca contra a gravidade | Movimento ativo contra gravidade e resistência | Força normal          |
|----------------------------------------|-----------------------|-----------------------|--------------------------------------------------|------------------------------------|------------------------------------------------|-----------------------|
| Abdução do braço D                     | <input type="radio"/> | <input type="radio"/> | <input type="radio"/>                            | <input type="radio"/>              | <input type="radio"/>                          | <input type="radio"/> |
|                                        |                       |                       |                                                  |                                    |                                                | <a href="#">reset</a> |
| Abdução do braço E                     | <input type="radio"/> | <input type="radio"/> | <input type="radio"/>                            | <input type="radio"/>              | <input type="radio"/>                          | <input type="radio"/> |
|                                        |                       |                       |                                                  |                                    |                                                | <a href="#">reset</a> |
| Flexão do antebraço D                  | <input type="radio"/> | <input type="radio"/> | <input type="radio"/>                            | <input type="radio"/>              | <input type="radio"/>                          | <input type="radio"/> |
|                                        |                       |                       |                                                  |                                    |                                                | <a href="#">reset</a> |
| Flexão do antebraço E                  | <input type="radio"/> | <input type="radio"/> | <input type="radio"/>                            | <input type="radio"/>              | <input type="radio"/>                          | <input type="radio"/> |
|                                        |                       |                       |                                                  |                                    |                                                | <a href="#">reset</a> |
| Extensão do punho D                    | <input type="radio"/> | <input type="radio"/> | <input type="radio"/>                            | <input type="radio"/>              | <input type="radio"/>                          | <input type="radio"/> |
|                                        |                       |                       |                                                  |                                    |                                                | <a href="#">reset</a> |
| Extensão do punho E                    | <input type="radio"/> | <input type="radio"/> | <input type="radio"/>                            | <input type="radio"/>              | <input type="radio"/>                          | <input type="radio"/> |
|                                        |                       |                       |                                                  |                                    |                                                | <a href="#">reset</a> |
| Flexão da perna ou flexão do quadril D | <input type="radio"/> | <input type="radio"/> | <input type="radio"/>                            | <input type="radio"/>              | <input type="radio"/>                          | <input type="radio"/> |
|                                        |                       |                       |                                                  |                                    |                                                | <a href="#">reset</a> |
| Flexão da perna ou flexão do quadril E | <input type="radio"/> | <input type="radio"/> | <input type="radio"/>                            | <input type="radio"/>              | <input type="radio"/>                          | <input type="radio"/> |
|                                        |                       |                       |                                                  |                                    |                                                | <a href="#">reset</a> |
| Extensão do joelho D                   | <input type="radio"/> | <input type="radio"/> | <input type="radio"/>                            | <input type="radio"/>              | <input type="radio"/>                          | <input type="radio"/> |
|                                        |                       |                       |                                                  |                                    |                                                | <a href="#">reset</a> |
| Extensão do joelho E                   | <input type="radio"/> | <input type="radio"/> | <input type="radio"/>                            | <input type="radio"/>              | <input type="radio"/>                          | <input type="radio"/> |
|                                        |                       |                       |                                                  |                                    |                                                | <a href="#">reset</a> |
| Flexão dorsal do pé D                  | <input type="radio"/> | <input type="radio"/> | <input type="radio"/>                            | <input type="radio"/>              | <input type="radio"/>                          | <input type="radio"/> |
|                                        |                       |                       |                                                  |                                    |                                                | <a href="#">reset</a> |
| Flexão dorsal do pé E                  | <input type="radio"/> | <input type="radio"/> | <input type="radio"/>                            | <input type="radio"/>              | <input type="radio"/>                          | <input type="radio"/> |
|                                        |                       |                       |                                                  |                                    |                                                | <a href="#">reset</a> |

MRC - Escore

### 7. Espirometria Simples (sem broncodilatador)

Foi realizada espirometria?

- Sim  Não

[reset](#)

### 8. Teste de sentar e levantar em 1 minuto

Sentar e levantar de uma cadeira sem apoio dos braços o mais rápido que puder por 1 minuto.

Cadeira com altura de aproximadamente 43 centímetros, encostada na parede para evitar deslizamento.

Avaliador segura a cadeira para evitar o deslizamento. Orientar o avaliado a sentar-se no meio da cadeira, com as costas eretas, os pés fixos no chão e os braços devem permanecer cruzados contra o peito. Checar se avaliado apoia os pés totalmente no chão. Se não, orientar que sente na ponta da cadeira.

Órtese  Não  Sim [reset](#)

Dispositivo auxiliar  Não  Sim [reset](#)

**AVALIAÇÃO ANTES DO TESTE** (manter o paciente em repouso por 10 minutos)

FC (bpm)

Saturação periférica de oxigênio (%)

Escala de Dispneia de Borg  0 - Nenhuma  
 0.5 - Muito, muito leve  
 1 - Muito leve  
 2 - Leve  
 3 - Moderada  
 4 - Pouco intensa  
 5 - Intensa  
 6  
 7 - Muito intensa  
 8  
 9 - Muito, muito intensa  
 10 - Máxima [reset](#)

**AVALIAÇÃO APÓS O TESTE**

Tempo completo  Sim  Não [reset](#)

Teste - Número total de repetições

**Observações:**

[Expand](#)

FC (bpm)

Saturação periférica de oxigênio (%)

Diferença na SatO2

Escala de Dispneia de Borg  0 - Nenhuma  
 0.5 - Muito, muito leve  
 1 - Muito leve  
 2 - Leve  
 3 - Moderada  
 4 - Pouco intensa  
 5 - Intensa  
 6  
 7 - Muito intensa  
 8  
 9 - Muito, muito intensa  
 10 - Máxima [reset](#)

9. Escalas Visual-analógicas de DOR

Deve-se perguntar ao paciente se possui dor. O examinador deve anotar em que lado (direito ou esquerdo) e quais locais o paciente refere dor (exemplo: ombro, joelho).

O paciente deve ser orientado a realizar um traço vertical na régua utilizando caneta para mensurar a sua dor, considerando que a nota "0" significa "sem dor/completamente confortável" e "10" significa "com muita dor/muito desconfortável".

O traço vertical na régua deve ser realizado mesmo se o paciente não relatar dor. Caso o paciente não possua capacidade para segurar a caneta a escala é considerada "não testável", porém o examinador deve anotar o lado e o local da dor.

Após o teste o examinador não precisa realizar a medida da distância da marcação (traço vertical) correspondente a dor do paciente, pois essa medida será realizada pela equipe de pesquisa.

Foi possível aplicar a escala visual analógica?  Não testável  Sim

[reset](#)

#### VAS lado DIREITO - Locais de dor

[Expand](#)

#### VAS lado ESQUERDO - Locais da dor

[Expand](#)

### 10. Timed Up & Go (TUG)

Este teste avalia o nível de mobilidade do indivíduo, mensurando o tempo gasto pelo voluntário para levantar-se de uma cadeira, sem ajuda dos braços, andar a uma distância de 3 metros, dar a volta e retornar.

No início do teste, o voluntário deve estar com as costas apoiadas no encosto da cadeira e, ao final, deve encostar novamente. O tempo deve ser cronometrado a partir da voz de comando até o momento em que o voluntário apoia novamente suas costas no encosto da cadeira. O teste deve ser realizado duas vezes: a primeira vez para familiarização e a segunda vez para tomada do tempo e registro do dado. Os dados devem ser registrados em segundos.

Teste realizado?  Não  Sim

[reset](#)

Uso de Dispositivo auxiliar?  Não  Sim

[reset](#)

### 11. Teste de Prensão Palmar

Paciente sentado, braço a 90 graus, deve exercer a maior força possível com a mão dominante no tempo de 5 seg.

Teste realizado?  Não  Sim

[reset](#)

### 12. Escala de Sonolência (EPWORTH)

O quanto é provável que você cochile ou adormeça nas seguintes situações, em vez de apenas se sentir cansado/a? Isso se refere ao seu modo de vida habitual nos últimos tempos. Mesmo se você não fez algumas destas coisas recentemente, tente pensar em como elas teriam afetado você (selecione o número mais apropriado para cada situação)

|                   | 0- Nunca cochilaria   | 1- Pequena chance de cochilar | 2- Chance média de cochilar | 3- Grande chance de cochilar |
|-------------------|-----------------------|-------------------------------|-----------------------------|------------------------------|
| Sentado/a e lendo | <input type="radio"/> | <input type="radio"/>         | <input type="radio"/>       | <input type="radio"/>        |

[reset](#)

|                                                                                            |                       |                       |                       |                       |       |
|--------------------------------------------------------------------------------------------|-----------------------|-----------------------|-----------------------|-----------------------|-------|
| Assistindo TV                                                                              | <input type="radio"/> | <input type="radio"/> | <input type="radio"/> | <input type="radio"/> | reset |
| Sentado(a) quieto(a) num local público (por exemplo: no cinema, no teatro ou numa reunião) | <input type="radio"/> | <input type="radio"/> | <input type="radio"/> | <input type="radio"/> | reset |
| Como passageiro(a) em um carro durante uma hora sem paradas                                | <input type="radio"/> | <input type="radio"/> | <input type="radio"/> | <input type="radio"/> | reset |
| Deitado(a) à tarde, para descansar, quando as circunstâncias permitem                      | <input type="radio"/> | <input type="radio"/> | <input type="radio"/> | <input type="radio"/> | reset |
| Sentado(a) conversando com alguém                                                          | <input type="radio"/> | <input type="radio"/> | <input type="radio"/> | <input type="radio"/> | reset |
| Sentado(a) quieto(a) depois de um almoço sem bebida alcoólica                              | <input type="radio"/> | <input type="radio"/> | <input type="radio"/> | <input type="radio"/> | reset |
| Dentro de um carro, parado durante alguns minutos no trânsito                              | <input type="radio"/> | <input type="radio"/> | <input type="radio"/> | <input type="radio"/> | reset |

EPWORTH - Escore

Pontuação de 0 a 9 - considerado normal.

Pontuação de 10 a 24 - Procure um médico você pode ter distúrbio do sono.

## 13. Avaliação de Insônia: Insomnia Severity Index

Para cada questão abaixo, marque a opção que descreve melhor a sua resposta. Por favor avalie a gravidade do(s) seu(s) problema(s) de insônia ATUALMENTE (por exemplo, NAS DUAS ÚLTIMAS SEMANAS).

|                                                                                                                                                                                                                                      | Nenhum                                                                                                                                                                                                                               | Leve                  | Moderado              | Grave                 | Muito grave           |       |
|--------------------------------------------------------------------------------------------------------------------------------------------------------------------------------------------------------------------------------------|--------------------------------------------------------------------------------------------------------------------------------------------------------------------------------------------------------------------------------------|-----------------------|-----------------------|-----------------------|-----------------------|-------|
| 1. Dificuldade de adormecer                                                                                                                                                                                                          | <input type="radio"/>                                                                                                                                                                                                                | <input type="radio"/> | <input type="radio"/> | <input type="radio"/> | <input type="radio"/> | reset |
| 2. Dificuldade para manter o sono                                                                                                                                                                                                    | <input type="radio"/>                                                                                                                                                                                                                | <input type="radio"/> | <input type="radio"/> | <input type="radio"/> | <input type="radio"/> | reset |
| 3. Problemas de acordar cedo demais                                                                                                                                                                                                  | <input type="radio"/>                                                                                                                                                                                                                | <input type="radio"/> | <input type="radio"/> | <input type="radio"/> | <input type="radio"/> | reset |
| 4. O quanto você se sente SATISFEITO / INSATISFEITO com o seu padrão ATUAL de sono?                                                                                                                                                  | <input type="radio"/> Muito satisfeito<br><input type="radio"/> Satisfeito<br><input type="radio"/> Indiferente<br><input type="radio"/> Insatisfeito<br><input type="radio"/> Muito insatisfeito                                    |                       |                       |                       |                       | reset |
| 5. O quanto você acha que o seu problema de sono é PERCEPTÍVEL para os outros em termos do prejuízo à sua qualidade de vida?                                                                                                         | <input type="radio"/> Não percebem<br><input type="radio"/> Percebem um pouco<br><input type="radio"/> Percebem de algum modo<br><input type="radio"/> Percebem muito<br><input type="radio"/> Percebem extremamente                 |                       |                       |                       |                       | reset |
| 6. O quão PREOCUPADO / ESTRESSADO você está com o seu problema atual de sono?                                                                                                                                                        | <input type="radio"/> Não estou preocupado<br><input type="radio"/> Um pouco preocupado<br><input type="radio"/> De algum modo preocupado<br><input type="radio"/> Muito preocupado<br><input type="radio"/> Extremamente preocupado |                       |                       |                       |                       | reset |
| 7. Até que ponto você considera que o seu problema de sono INTERFERE com o seu funcionamento no dia-a-dia (por exemplo, cansaço diurno, humor, capacidade para o trabalho e tarefas diárias, concentração, memória, etc) ATUALMENTE? | <input type="radio"/> Não interfere<br><input type="radio"/> Interfere um pouco<br><input type="radio"/> Interfere de algum modo<br><input type="radio"/> Interfere muito<br><input type="radio"/> Interfere extremamente            |                       |                       |                       |                       | reset |

Escore total

## 14. Teste de Caminhada de 10 metros

Tempo - Teste de caminhada 10 metros (segundos)

  
 Segundos e milissegundos. Utilize o ponto como separador.

## 15. MEDIDA DE INDEPENDÊNCIA FUNCIONAL: MIF

| Níveis | Descrição                                              |
|--------|--------------------------------------------------------|
| 1      | Ajuda total                                            |
| 2      | Ajuda máxima                                           |
| 3      | Ajuda moderada                                         |
| 4      | Ajuda mínima                                           |
| 5      | Supervisão                                             |
| 6      | Independência modificada (ajuda técnica)               |
| 7      | Independência completa (em segurança, em tempo normal) |

## Autocuidado

|                                 | 1- Ajuda total        | 2- Ajuda máxima       | 3- Ajuda moderada     | 4- Ajuda mínima       | 5- Supervisão         | 6- Independ. modificada | 7- Independ. completa |
|---------------------------------|-----------------------|-----------------------|-----------------------|-----------------------|-----------------------|-------------------------|-----------------------|
| A. Alimentação                  | <input type="radio"/> | <input type="radio"/> | <input type="radio"/> | <input type="radio"/> | <input type="radio"/> | <input type="radio"/>   | <input type="radio"/> |
|                                 |                       |                       |                       |                       |                       |                         | <a href="#">reset</a> |
| B. Higiene pessoal              | <input type="radio"/> | <input type="radio"/> | <input type="radio"/> | <input type="radio"/> | <input type="radio"/> | <input type="radio"/>   | <input type="radio"/> |
|                                 |                       |                       |                       |                       |                       |                         | <a href="#">reset</a> |
| C. Banho                        | <input type="radio"/> | <input type="radio"/> | <input type="radio"/> | <input type="radio"/> | <input type="radio"/> | <input type="radio"/>   | <input type="radio"/> |
|                                 |                       |                       |                       |                       |                       |                         | <a href="#">reset</a> |
| D. Vestir metade superior       | <input type="radio"/> | <input type="radio"/> | <input type="radio"/> | <input type="radio"/> | <input type="radio"/> | <input type="radio"/>   | <input type="radio"/> |
|                                 |                       |                       |                       |                       |                       |                         | <a href="#">reset</a> |
| E. Vestir metade inferior       | <input type="radio"/> | <input type="radio"/> | <input type="radio"/> | <input type="radio"/> | <input type="radio"/> | <input type="radio"/>   | <input type="radio"/> |
|                                 |                       |                       |                       |                       |                       |                         | <a href="#">reset</a> |
| F. Utilização de vaso sanitário | <input type="radio"/> | <input type="radio"/> | <input type="radio"/> | <input type="radio"/> | <input type="radio"/> | <input type="radio"/>   | <input type="radio"/> |
|                                 |                       |                       |                       |                       |                       |                         | <a href="#">reset</a> |

## Controle de esfínteres

|                       | 1- Ajuda total        | 2- Ajuda máxima       | 3- Ajuda moderada     | 4- Ajuda mínima       | 5- Supervisão         | 6- Independ. modificada | 7- Independ. completa |
|-----------------------|-----------------------|-----------------------|-----------------------|-----------------------|-----------------------|-------------------------|-----------------------|
| G. Controle de urina  | <input type="radio"/> | <input type="radio"/> | <input type="radio"/> | <input type="radio"/> | <input type="radio"/> | <input type="radio"/>   | <input type="radio"/> |
|                       |                       |                       |                       |                       |                       |                         | <a href="#">reset</a> |
| H. Controle das fezes | <input type="radio"/> | <input type="radio"/> | <input type="radio"/> | <input type="radio"/> | <input type="radio"/> | <input type="radio"/>   | <input type="radio"/> |
|                       |                       |                       |                       |                       |                       |                         | <a href="#">reset</a> |

## Mobilidade e locomoção

|                                     | 1- Ajuda total        | 2- Ajuda máxima       | 3- Ajuda moderada     | 4- Ajuda mínima       | 5- Supervisão         | 6- Independ. modificada | 7- Independ. completa |
|-------------------------------------|-----------------------|-----------------------|-----------------------|-----------------------|-----------------------|-------------------------|-----------------------|
| I. Leito, cadeira, cadeira de rodas | <input type="radio"/> | <input type="radio"/> | <input type="radio"/> | <input type="radio"/> | <input type="radio"/> | <input type="radio"/>   | <input type="radio"/> |
|                                     |                       |                       |                       |                       |                       |                         | <a href="#">reset</a> |
| J. Vaso sanitário                   | <input type="radio"/> | <input type="radio"/> | <input type="radio"/> | <input type="radio"/> | <input type="radio"/> | <input type="radio"/>   | <input type="radio"/> |
|                                     |                       |                       |                       |                       |                       |                         | <a href="#">reset</a> |
| K. Banheira, chuveiro               | <input type="radio"/> | <input type="radio"/> | <input type="radio"/> | <input type="radio"/> | <input type="radio"/> | <input type="radio"/>   | <input type="radio"/> |
|                                     |                       |                       |                       |                       |                       |                         | <a href="#">reset</a> |
| L. Marcha, cadeira de rodas         | <input type="radio"/> | <input type="radio"/> | <input type="radio"/> | <input type="radio"/> | <input type="radio"/> | <input type="radio"/>   | <input type="radio"/> |
|                                     |                       |                       |                       |                       |                       |                         | <a href="#">reset</a> |
| M. Escadas                          | <input type="radio"/> | <input type="radio"/> | <input type="radio"/> | <input type="radio"/> | <input type="radio"/> | <input type="radio"/>   | <input type="radio"/> |
|                                     |                       |                       |                       |                       |                       |                         | <a href="#">reset</a> |

## Comunicação e Cognição social

|                | 1- Ajuda total        | 2- Ajuda máxima       | 3- Ajuda moderada     | 4- Ajuda mínima       | 5- Supervisão         | 6- Independ. modificada | 7- Independ. completa |
|----------------|-----------------------|-----------------------|-----------------------|-----------------------|-----------------------|-------------------------|-----------------------|
| N. Compreensão | <input type="radio"/> | <input type="radio"/> | <input type="radio"/> | <input type="radio"/> | <input type="radio"/> | <input type="radio"/>   | <input type="radio"/> |
|                |                       |                       |                       |                       |                       |                         | <a href="#">reset</a> |
| O. Expressão   | <input type="radio"/> | <input type="radio"/> | <input type="radio"/> | <input type="radio"/> | <input type="radio"/> | <input type="radio"/>   | <input type="radio"/> |
|                |                       |                       |                       |                       |                       |                         | <a href="#">reset</a> |

|                                                                                                                                                                        |                                                                                          |                       |                       |                       |                       |                       |                       |                       |                       |
|------------------------------------------------------------------------------------------------------------------------------------------------------------------------|------------------------------------------------------------------------------------------|-----------------------|-----------------------|-----------------------|-----------------------|-----------------------|-----------------------|-----------------------|-----------------------|
| <b>P. Interação social</b>                                                                                                                                             | <input type="radio"/>                                                                    | <input type="radio"/> | <input type="radio"/> | <input type="radio"/> | <input type="radio"/> | <input type="radio"/> | <input type="radio"/> | <input type="radio"/> | <a href="#">reset</a> |
| <b>Q. Resolução de problemas</b>                                                                                                                                       | <input type="radio"/>                                                                    | <input type="radio"/> | <input type="radio"/> | <input type="radio"/> | <input type="radio"/> | <input type="radio"/> | <input type="radio"/> | <input type="radio"/> | <a href="#">reset</a> |
| <b>R. Memória</b>                                                                                                                                                      | <input type="radio"/>                                                                    | <input type="radio"/> | <input type="radio"/> | <input type="radio"/> | <input type="radio"/> | <input type="radio"/> | <input type="radio"/> | <input type="radio"/> | <a href="#">reset</a> |
| <b>Escore - MIF</b>                                                                                                                                                    | <input type="text"/>                                                                     |                       |                       |                       |                       |                       |                       |                       |                       |
| <b>16. Escala Funcional de Ingestão por Via Oral - Functional Oral Intake Scale - FOIs</b>                                                                             |                                                                                          |                       |                       |                       |                       |                       |                       |                       |                       |
| <b>Escala Funcional de Ingestão por Via Oral - Functional Oral Intake Scale - FOIs</b>                                                                                 |                                                                                          |                       |                       |                       |                       |                       |                       |                       |                       |
| <input type="radio"/> Nível 1: Nada por via oral                                                                                                                       |                                                                                          |                       |                       |                       |                       |                       |                       |                       |                       |
| <input type="radio"/> Nível 2: Dependente de via alternativa e mínima via oral de algum alimento ou líquido                                                            |                                                                                          |                       |                       |                       |                       |                       |                       |                       |                       |
| <input type="radio"/> Nível 3: Dependente de via alternativa com consistente via oral de alimento ou líquido                                                           |                                                                                          |                       |                       |                       |                       |                       |                       |                       |                       |
| <input type="radio"/> Nível 4: Via oral total de uma única consistência                                                                                                |                                                                                          |                       |                       |                       |                       |                       |                       |                       |                       |
| <input type="radio"/> Nível 5: Via oral total com múltiplas consistências, porém com necessidade de preparo especial ou compensações                                   |                                                                                          |                       |                       |                       |                       |                       |                       |                       |                       |
| <input type="radio"/> Nível 6: Via oral total com múltiplas consistências, porém sem necessidade de preparo especial ou compensações, porém com restrições alimentares |                                                                                          |                       |                       |                       |                       |                       |                       |                       |                       |
| <input type="radio"/> Nível 7: Via oral total sem restrições                                                                                                           |                                                                                          |                       |                       |                       |                       |                       |                       |                       |                       |
| <a href="#">reset</a>                                                                                                                                                  |                                                                                          |                       |                       |                       |                       |                       |                       |                       |                       |
| <b>17. ULTRASONOGRAFIA</b>                                                                                                                                             |                                                                                          |                       |                       |                       |                       |                       |                       |                       |                       |
| <b>Ultrassonografia</b>                                                                                                                                                | <input type="radio"/> Não realizada <input type="radio"/> Realizada                      |                       |                       |                       |                       |                       |                       |                       | <a href="#">reset</a> |
| <b>Encaminhamento para Reabilitação</b>                                                                                                                                |                                                                                          |                       |                       |                       |                       |                       |                       |                       |                       |
| <b>Paciente será encaminhado para reabilitação?</b>                                                                                                                    | <input type="radio"/> Não <input type="radio"/> Sim <input type="radio"/> Não disponível |                       |                       |                       |                       |                       |                       |                       | <a href="#">reset</a> |



## Post-Acute Sequelae of Sars-CoV-2 (PASC): protocol for a multidisciplinary prospective observational evaluation of a cohort of patients surviving hospitalization in São Paulo, Brazil

### INTERVIEW GUIDES

#### NEUROLOGIA

##### ETAPA 1a: Questionário de Sintomas

Data da avaliação

  Today D-M-Y

Tempo (dias) da admissão hospitalar até a realização da avaliação

Nome do médico

Para qualquer pergunta em que a resposta corresponder ao campo em negrito e sublinhado, o(a) paciente deverá fazer a avaliação neurológica mais aprofundada (ETAPA 2).

1. Você já teve perda de consciência antes da COVID-19?

- Sim (mais de uma vez)**
- Sim (uma vez)
- Nunca
- Não sabe
- Não respondeu

[reset](#)

2. Este sintoma aconteceu depois da doença?

- Sim (mais de uma vez)**
- Sim (uma vez)
- Nunca
- Não sabe
- Não se aplica

[reset](#)

3. Você já teve episódios em que perdeu o contato com o mundo ambiente antes da COVID-19?

- Sim**
- Possível
- Nunca
- Não sabe
- Não respondeu

[reset](#)

4. Este sintoma aconteceu depois da doença?

- Sim**
- Possível
- Nunca
- Não sabe
- Não se aplica

[reset](#)



5. Você já teve tremores ou espasmos dos braços e pernas que não conseguia controlar antes da COVID-19?

- Sim**  
 Não  
 Não sabe  
 Não respondeu

reset

6. Este sintoma aconteceu depois da doença?

- Sim**  
 Não  
 Não sabe  
 Não se aplica

reset

8. Sua fala é normal?

- Sim  
 **Não**  
 Não sabe  
 Não respondeu

reset

10. Você já teve episódios de dor no rosto ou face antes da COVID-19?

- Sim**  
 Não  
 Não sabe  
 Não respondeu

reset

11. Este sintoma aconteceu depois da doença?

- Sim**  
 Não  
 Não sabe  
 Não se aplica

reset

13. Seu rosto ou face ou parte deles já ficaram paralisados mais de 24h antes da COVID-19?

- Sim**  
 Não  
 Não sabe  
 Não respondeu

reset

14. Este sintoma aconteceu depois da doença?

- Sim**  
 Não  
 Não sabe  
 Não se aplica

reset

16. Você já teve fraqueza nos seus braços ou pernas, durando mais de 24h antes da COVID-19?

- Sim**  
 Não  
 Não sabe  
 Não respondeu

reset

17. Este sintoma aconteceu depois da doença?

- Sim**  
 Não  
 Não sabe  
 Não se aplica

reset

19. Você já ficou sem conseguir andar normalmente antes da COVID-19?

- Sim**  
 Não  
 Não sabe  
 Não respondeu

reset

20. Este sintoma aconteceu depois da doença?

- Sim**  
 Não  
 Não sabe  
 Não se aplica

reset

22. Você já teve sensação diminuída, ou sensação anormal nos seus braços ou pernas, durando mais de 24h antes da COVID-19?

- Sim**  
 Não  
 Não sabe  
 Não respondeu

reset

23. Este sintoma aconteceu depois da doença?

- Sim**  
 Não  
 Não sabe  
 Não se aplica

reset

25. Você já sofreu com dor de cabeça antes da COVID-19?

- Sim  
 Não  
 Não sabe  
 Não respondeu

reset

26. Este sintoma aconteceu depois da doença?

- Sim  
 Não  
 Não sabe  
 Não se aplica

reset

#### ETAPA 1B: Exame Neurológico

**Obs: Para qualquer exame em que a resposta corresponder ao campo em negrito e sublinhado, o paciente deverá fazer a avaliação neurológica mais aprofundada (ETAPA 2).**

Fique com os braços acima da cabeça por 30 segundos

- Consegue ambos os membros  
 Impossível testar  
 Recusa  
 Não entendeu  
 **Incapaz lado direito**  
 **Incapaz lado esquerdo**  
 **Incapaz bilateral**

reset

**Pegue palito do chão**

- Consegue ambos os membros
- Impossível testar
- Recusa
- Não entendeu
- Incapaz lado direito**
- Incapaz lado esquerdo**
- Incapaz bilateral**

reset

**Feche os olhos. Sinta o pano. É liso ou áspero?**

- Consegue ambos os membros
- Impossível testar
- Recusa
- Não entendeu
- Incapaz lado direito**
- Incapaz lado esquerdo**
- Incapaz bilateral**

reset

**Ponha as mãos na sua frente. Feche os olhos. Encoste o indicador no nariz. Repita com o outro braço**

- Consegue ambos os membros
- Impossível testar
- Recusa
- Não entendeu
- Controle ruim à direita**
- Controle ruim à esquerda**
- Controle ruim bilateral**

reset

**Ande colocando o calcanhar encostado na ponta do pé (2 metros)**

- Sucesso
- Impossível testar
- Recusa
- Não entendeu
- Fica em pé com dificuldade**
- Incapaz**

reset

**Fique em pé com os dois pés juntos**

- Sucesso
- Impossível testar
- Recusa
- Não entendeu
- Incapaz**

reset

**ETAPA 2: Avaliação Neurológica aprofundada****Esta etapa consiste em exame detalhado feito pelo neurologista.****0. Anamnese breve (explicar sintomas neurológicos pré e pós-COVID), duas linhas no máximo**

Expand

**1a. Motricidade - velocidade de movimentos, desvio pronador, manobras de oposição (se necessario), reflexos**

- Normal
- Hemiparesia esquerda
- Hemiparesia direita
- Paraparesia
- Tetraparesia
- Outras alterações

**1b. Sinais piramidais**

- Ausentes  Presentes

[reset](#)**1c. Reflexos**

- Exaltados  Presentes  Hipoativos  Abolidos

[reset](#)**1d. Descrição livre da motricidade (CAMPO LIVRE)**[Expand](#)**2a. Movimentos involuntários**

- Ausentes
- Tremor
- Miocloniais
- Parkinsonismo
- Outros

**2b. Descrição livre dos movimentos involuntários (CAMPO LIVRE)**[Expand](#)**3a. Sensibilidade térmico-dolorosa (alfinete)**

- Normal
- Hipoestesia à direita
- Hipoestesia à esquerda
- Hipoestesia - nível
- Hipoestesia - padrão bota e luva
- Outros

**3b. Descrição livre da sensibilidade superficial (CAMPO LIVRE)**[Expand](#)**4a. Palestesia (diapasão)**

- Normal
- Hipopalestesia à direita
- Hipopalestesia à esquerda
- Hipopalestesia - nível
- Hipoestesia - padrão bota e luva
- Outros

**4b. Descrição livre da sensibilidade profunda (CAMPO LIVRE)**[Expand](#)**5a. Coordenação**

- Normal
- Hemiataxia cerebelar direita
- Hemiataxia cerebelar esquerda
- Ataxia cerebelar global
- Ataxia sensitiva
- Outros

**5b. Descrição livre da coordenação (CAMPO LIVRE)**[Expand](#)**6. Sinais meníngeos (rigidez da nuca, Brudzinski)**

- Ausente  Presente

[reset](#)**7. Nervos cranianos****7a. II (campos visuais somente)**

- Normais
- Hemianopsia (ou quadrantanopsia) direita
- Hemianopsia (ou quadrantanopsia) esquerda
- Amaurose bilateral
- Outros

**7a-2. Descrição livre dos campos visuais (CAMPO LIVRE)**[Expand](#)**7b. Motricidade ocular**

- Normal  Paralisia de nervos cranianos

[reset](#)**7b-2. Descrição livre da motricidade ocular (CAMPO LIVRE)**[Expand](#)**7c. Trigemios**

- Normais
- Hipoestesia direita
- Hipoestesia esquerda
- Outros

[reset](#)

**7c-2. Descrição livre do exame do trigêmio (CAMPO LIVRE)**[Expand](#)**7d. Faciais**

- Normais
- Paralisia facial direita - padrão periférico
- Paralisia facial direita - padrão central
- Paralisia facial esquerda - padrão periférico
- Paralisia facial esquerda - padrão central
- Outros

**7d-2. Descrição livre de nervos faciais (CAMPO LIVRE)**[Expand](#)**7e. Vestíbulo-cocleares (nistagmo, VOR, não testar audição)**

- Normais
- Disfunção à direita
- Disfunção à esquerda
- Outros

[reset](#)**7e-2. Descrição livre de nervos vestibulo-cocleares (CAMPO LIVRE)**[Expand](#)**7f. Glossofaríngeo, Vago, Acessório, Hipoglosso (IX-XII)**

- Normais
- Alterados

[reset](#)**7f-2. Descrição livre de nervos IX-XII (CAMPO LIVRE)**[Expand](#)**8a. Diagnósticos neurológicos (mais de uma possibilidade)**

- Paciente normal
- Epilepsia
- Doença cerebrovascular
- Polineuropatia/miopatia
- Outros

**8b. Descrição livre dos diagnósticos neurológicos (CAMPO LIVRE)**[Expand](#)

**Entrevistador(a):** no espaço abaixo, registrar informações adicionais sobre sintomas apresentados pelo paciente após a internação por COVID-19.

[Expand](#)



## Post-Acute Sequelae of Sars-CoV-2 (PASC): protocol for a multidisciplinary prospective observational evaluation of a cohort of patients surviving hospitalization in São Paulo, Brazil

### INTERVIEW GUIDES

#### PSIQUIATRIA

Tempo (dias) da admissão hospitalar até a avaliação

#### Perguntas Iniciais

Formato da avaliação

Presencial  Teleconsulta

reset

Data da avaliação

 Today D-M-Y

Nome do médico (a) / avaliador (a)

Traumatismo crânio-encefálico antes da COVID-19?

Sim  
 Não  
 Não sabe/ não quer responder

reset

História familiar de transtornos psiquiátricos (pai, mãe, irmãos biológicos)?

Sim  Não

reset

O quanto a COVID-19 criou problemas financeiros para você e sua família?

Nada  
 Um pouco  
 Moderadamente  
 Bastante  
 Extremamente

reset

O Sr.(a) perdeu algum parente próximo que faleceu por COVID-19?

Não  
 Mãe  
 Pai  
 Esposo(a)  
 Filho(a)  
 Irmã(o)  
 Neto(a)  
 Avô(ó)

#### Escala Hospitalar de Ansiedade e Depressão (HAD)

Esta seção tem como objetivo avaliar e quantificar a **presença de sintomas de ansiedade e depressão**.

Assinale a alternativa que melhor descreve a como o(a) paciente tem se sentido na **ÚLTIMA SEMANA**.

1 - Eu me sinto tenso ou contraído

A maior parte do tempo  
 Boa parte do tempo  
 De vez em quando  
 Nunca

reset



|                                                                                                                                                         |                                                                                                                                                                                                                        |                       |
|---------------------------------------------------------------------------------------------------------------------------------------------------------|------------------------------------------------------------------------------------------------------------------------------------------------------------------------------------------------------------------------|-----------------------|
| <b>2 - Eu ainda sinto gosto pelas mesmas coisas de antes</b>                                                                                            | <input type="radio"/> Sim, do mesmo jeito que antes<br><input type="radio"/> Não tanto quanto antes<br><input type="radio"/> Só um pouco<br><input type="radio"/> Já não sinto mais prazer em nada                     | <a href="#">reset</a> |
| <b>3 - Eu sinto uma espécie de medo, como se alguma coisa ruim fosse acontecer</b>                                                                      | <input type="radio"/> Sim, e de um jeito muito forte<br><input type="radio"/> Sim, mas não tão forte<br><input type="radio"/> Um pouco, mas isso não me preocupa<br><input type="radio"/> Não sinto nada disso         | <a href="#">reset</a> |
| <b>4 - Dou risada e me divirto quando vejo coisas engraçadas</b>                                                                                        | <input type="radio"/> Do mesmo jeito que antes<br><input type="radio"/> Atualmente um pouco menos<br><input type="radio"/> Atualmente bem menos<br><input type="radio"/> Não consigo mais                              | <a href="#">reset</a> |
| <b>5 - Estou com a cabeça cheia de preocupações</b>                                                                                                     | <input type="radio"/> A maior parte do tempo<br><input type="radio"/> Boa parte do tempo<br><input type="radio"/> De vez em quando<br><input type="radio"/> Raramente                                                  | <a href="#">reset</a> |
| <b>6 - Eu me sinto alegre (avaliador diz que precisa retomar o ponto que perguntou na questão 3 da escala anterior, para especificar um pouco mais)</b> | <input type="radio"/> A maior parte do tempo<br><input type="radio"/> Muitas vezes<br><input type="radio"/> Poucas vezes<br><input type="radio"/> Nunca                                                                | <a href="#">reset</a> |
| <b>7 - Consigo ficar sentado à vontade e me sentir relaxado</b>                                                                                         | <input type="radio"/> Sim, quase sempre<br><input type="radio"/> Muitas vezes<br><input type="radio"/> Poucas vezes<br><input type="radio"/> Nunca                                                                     | <a href="#">reset</a> |
| <b>8 - Eu estou lento para pensar e fazer as coisas</b>                                                                                                 | <input type="radio"/> Quase sempre<br><input type="radio"/> Muitas vezes<br><input type="radio"/> De vez em quando<br><input type="radio"/> Nunca                                                                      | <a href="#">reset</a> |
| <b>9 - Eu tenho uma sensação ruim de medo, como um frio na barriga ou um aperto no estômago</b>                                                         | <input type="radio"/> Nunca<br><input type="radio"/> De vez em quando<br><input type="radio"/> Muitas vezes<br><input type="radio"/> Quase sempre                                                                      | <a href="#">reset</a> |
| <b>10 - Eu perdi o interesse em cuidar da minha aparência</b>                                                                                           | <input type="radio"/> Completamente<br><input type="radio"/> Não estou mais me cuidando como deveria<br><input type="radio"/> Talvez não tanto quanto antes<br><input type="radio"/> Me cuido do mesmo jeito que antes | <a href="#">reset</a> |
| <b>11 - Eu me sinto inquieto, como se eu não pudesse ficar parado em lugar nenhum</b>                                                                   | <input type="radio"/> Sim, demais<br><input type="radio"/> Bastante<br><input type="radio"/> Um pouco<br><input type="radio"/> Não me sinto assim                                                                      | <a href="#">reset</a> |
| <b>12 - Fico esperando animado as coisas boas que estão por vir</b>                                                                                     | <input type="radio"/> Do mesmo jeito que antes<br><input type="radio"/> Um pouco menos que antes<br><input type="radio"/> Bem menos do que antes<br><input type="radio"/> Quase nunca                                  | <a href="#">reset</a> |

**13 - De repente, tenho a sensação de entrar em pânico**

A quase todo momento  
 Várias vezes  
 De vez em quando  
 Não sinto isso

[reset](#)

**14 - Consigo sentir prazer quando assisto a um bom programa de televisão, de rádio ou quando leio alguma coisa**

Quase sempre  
 Várias vezes  
 Poucas vezes  
 Quase nunca

[reset](#)

**Pontuação Ansiedade**

**Pontuação Depressão**

TEPT-Checklist

**Instruções:**

Abaixo, há uma lista de problemas e de queixas que as pessoas às vezes apresentam como uma reação a situações de vida estressantes. Gostariamos que respondesse tendo em vista sua vida APÓS o COVID-19.  
 Por favor, indique o quanto você foi incomodado por estes problemas **durante o último mês**.  
 Por favor, marque 1 para "nada", 2 para "um pouco", 3 para "médio", 4 para "bastante" e 5 para "muito".

|                                                                                                                                                                                 | Nada                  | Um pouco              | Moderado              | Bastante              | Muito                 |
|---------------------------------------------------------------------------------------------------------------------------------------------------------------------------------|-----------------------|-----------------------|-----------------------|-----------------------|-----------------------|
| <b>1. Memória, pensamentos e imagens repetitivas e perturbadores referentes a uma experiência estressante do passado?</b>                                                       | <input type="radio"/> | <input type="radio"/> | <input type="radio"/> | <input type="radio"/> | <input type="radio"/> |
| <a href="#">reset</a>                                                                                                                                                           |                       |                       |                       |                       |                       |
| <b>2. Sonhos repetitivos e perturbadores referentes a uma experiência estressante do passado?</b>                                                                               | <input type="radio"/> | <input type="radio"/> | <input type="radio"/> | <input type="radio"/> | <input type="radio"/> |
| <a href="#">reset</a>                                                                                                                                                           |                       |                       |                       |                       |                       |
| <b>3. De repente, agir ou sentir como se uma experiência estressante do passado estivesse acontecendo de novo (como se você estivesse revivendo)?</b>                           | <input type="radio"/> | <input type="radio"/> | <input type="radio"/> | <input type="radio"/> | <input type="radio"/> |
| <a href="#">reset</a>                                                                                                                                                           |                       |                       |                       |                       |                       |
| <b>4. Sentir-se muito chateado ou preocupado quando alguma coisa lembra você de uma experiência estressante do passado?</b>                                                     | <input type="radio"/> | <input type="radio"/> | <input type="radio"/> | <input type="radio"/> | <input type="radio"/> |
| <a href="#">reset</a>                                                                                                                                                           |                       |                       |                       |                       |                       |
| <b>5. Sentir sintomas físicos (por exemplo, coração batendo forte, dificuldade de respirar, suores) quando alguma coisa lembra você uma experiência estressante do passado?</b> | <input type="radio"/> | <input type="radio"/> | <input type="radio"/> | <input type="radio"/> | <input type="radio"/> |
| <a href="#">reset</a>                                                                                                                                                           |                       |                       |                       |                       |                       |
| <b>6. Evitar pensar ou falar sobre uma experiência estressante do passado ou evitar ter sentimentos relacionados a esta experiência?</b>                                        | <input type="radio"/> | <input type="radio"/> | <input type="radio"/> | <input type="radio"/> | <input type="radio"/> |
| <a href="#">reset</a>                                                                                                                                                           |                       |                       |                       |                       |                       |
| <b>7. Evitar atividades ou situações porque elas lembram uma experiência estressante do passado?</b>                                                                            | <input type="radio"/> | <input type="radio"/> | <input type="radio"/> | <input type="radio"/> | <input type="radio"/> |
| <a href="#">reset</a>                                                                                                                                                           |                       |                       |                       |                       |                       |
| <b>8. Dificuldades para lembrar-se de partes importantes de uma experiência estressante do passado?</b>                                                                         | <input type="radio"/> | <input type="radio"/> | <input type="radio"/> | <input type="radio"/> | <input type="radio"/> |
| <a href="#">reset</a>                                                                                                                                                           |                       |                       |                       |                       |                       |
| <b>9. Perda de interesse nas atividades de que você antes costumava gostar?</b>                                                                                                 | <input type="radio"/> | <input type="radio"/> | <input type="radio"/> | <input type="radio"/> | <input type="radio"/> |
| <a href="#">reset</a>                                                                                                                                                           |                       |                       |                       |                       |                       |

|                                                                                                                     |                       |                       |                       |                       |                       |                       |
|---------------------------------------------------------------------------------------------------------------------|-----------------------|-----------------------|-----------------------|-----------------------|-----------------------|-----------------------|
| 10. Sentir-se distante ou afastado das outras pessoas?                                                              | <input type="radio"/> | <input type="radio"/> | <input type="radio"/> | <input type="radio"/> | <input type="radio"/> | <a href="#">reset</a> |
| 11. Sentir-se emocionalmente entorpecido ou incapaz de ter sentimentos amorosos pelas pessoas que lhe são próximas? | <input type="radio"/> | <input type="radio"/> | <input type="radio"/> | <input type="radio"/> | <input type="radio"/> | <a href="#">reset</a> |
| 12. Sentir como você não tivesse expectativas para o futuro?                                                        | <input type="radio"/> | <input type="radio"/> | <input type="radio"/> | <input type="radio"/> | <input type="radio"/> | <a href="#">reset</a> |
| 13. Ter problemas para pegar no sono ou para continuar dormindo?                                                    | <input type="radio"/> | <input type="radio"/> | <input type="radio"/> | <input type="radio"/> | <input type="radio"/> | <a href="#">reset</a> |
| 14. Sentir-se irritável ou ter explosões de raiva?                                                                  | <input type="radio"/> | <input type="radio"/> | <input type="radio"/> | <input type="radio"/> | <input type="radio"/> | <a href="#">reset</a> |
| 15. Ter dificuldades para se concentrar?                                                                            | <input type="radio"/> | <input type="radio"/> | <input type="radio"/> | <input type="radio"/> | <input type="radio"/> | <a href="#">reset</a> |
| 16. Estar "superalerta", vigilante ou "em guarda"?                                                                  | <input type="radio"/> | <input type="radio"/> | <input type="radio"/> | <input type="radio"/> | <input type="radio"/> | <a href="#">reset</a> |
| 17. Sentir-se tenso ou facilmente sobressaltado?                                                                    | <input type="radio"/> | <input type="radio"/> | <input type="radio"/> | <input type="radio"/> | <input type="radio"/> | <a href="#">reset</a> |

## Questionário AUDIT - Abuso e dependência de álcool

1. Com que frequência consome bebidas que contêm álcool? (número que melhor corresponde à sua situação)

- Nunca
- Uma vez por mês ou menos
- Duas a quatro vezes por mês
- Duas a três vezes por semana
- Quatro ou mais vezes por semana

[reset](#)

3. Com que frequência consome seis bebidas ou mais numa única ocasião?

- Nunca
- Menos de uma vez por mês
- Pelo menos uma vez por mês
- Pelo menos uma vez por semana
- Diariamente ou quase diariamente

[reset](#)

4. Nos últimos 12 meses, com que frequência se apercebeu de que não conseguia parar de beber depois de começar?

- Nunca
- Menos de uma vez por mês
- Pelo menos uma vez por mês
- Pelo menos uma vez por semana
- Diariamente ou quase diariamente

[reset](#)

5. Nos últimos 12 meses, com que frequência não conseguiu cumprir as tarefas que habitualmente lhe exigem por ter bebido?

- Nunca
- Menos de uma vez por mês
- Pelo menos uma vez por mês
- Pelo menos uma vez por semana
- Diariamente ou quase diariamente

[reset](#)

6. Nos últimos 12 meses, com que frequência precisou de beber logo de manhã para "curar" uma ressaca?

- Nunca
- Menos de uma vez por mês
- Pelo menos uma vez por mês
- Pelo menos uma vez por semana
- Diariamente ou quase diariamente

[reset](#)

**7. Nos últimos 12 meses, com que frequência teve sentimentos de culpa ou de remorsos por ter bebido?**

- Nunca  
 Menos de uma vez por mês  
 Pelo menos uma vez por mês  
 Pelo menos uma vez por semana  
 Diariamente ou quase diariamente

[reset](#)**8. Nos últimos 12 meses, com que frequência não se lembrou do que aconteceu na noite anterior por causa de ter bebido?**

- Nunca  
 Menos de uma vez por mês  
 Pelo menos uma vez por mês  
 Pelo menos uma vez por semana  
 Diariamente ou quase diariamente

[reset](#)**9. Já alguma vez ficou ferido ou ficou alguém ferido por você ter bebido?**

- Não  
 Sim, mas não nos últimos 12 meses  
 Sim, aconteceu nos últimos 12 meses

[reset](#)**10. Já alguma vez um familiar, amigo, médico ou profissional de saúde manifestou preocupação pelo seu consumo de álcool ou sugeriu que deixasse de beber?**

- Não  
 Sim, mas não nos últimos 12 meses  
 Sim, aconteceu nos últimos 12 meses

[reset](#)**AUDIT - Escore****Suicídio: ASQ Suicide Screening - Adaptado****1. Nas últimas 4 semanas, você desejou que estivesse morto?**

- Nunca  
 Raramente  
 Frequentemente  
 Muito frequentemente / Diariamente

[reset](#)**2. Nas últimas 4 semanas, você sentiu que você ou sua família estariam em melhor situação se você estivesse morto**

- Nunca  
 Raramente  
 Frequentemente  
 Muito frequentemente / Diariamente

[reset](#)**3. Nas últimas 4 semanas, você tem tido pensamento sobre se matar?**

- Nunca  
 Raramente  
 Frequentemente  
 Muito frequentemente / Diariamente

[reset](#)**4. Você já tentou se matar?**

- Sim  Não

[reset](#)**6. Alguma das tentativas ocorreu no último ano?**

- Sim  Não

[reset](#)**Modificação no padrão de uso de substâncias após a internação por COVID-19****1. Aumentou o uso de álcool após a internação por COVID-19?**

- Sim  Não

[reset](#)

**2. Tabagismo (outros detalhes já abordados nos questionários de hábitos de vida - CADERNO 6)  
Aumentou o uso após a internação por COVID-19?**

Sim  Não

[reset](#)

**3. História pregressa de uso de Maconha/Cannabis, anterior à internação por COVID-19?**

- Nunca  
 Raramente  
 uma vez por mês ou menos, de forma recreativa  
 Uso regular (1 a 2 vezes na semana)  
 Diariamente

[reset](#)

**Iniciou uso após a internação por COVID-19?**

Sim  Não  Não sabe/Não quer responder

[reset](#)

**Aumentou o uso após a internação por COVID-19?**

Sim  Não  Não sabe/Não quer responder

[reset](#)

**4. História pregressa de uso de calmantes / remédios para dormir (benzodiazepínicos, drogas Z) anterior à internação por COVID-19?**

Sim  Não  Não sabe/Não quer responder

[reset](#)

**Iniciou uso após a internação por COVID-19?**

Sim  Não  Não sabe/Não quer responder

[reset](#)

**Aumentou o uso após a internação por COVID-19?**

Sim  Não  Não sabe/Não quer responder

[reset](#)

**5. Uso frequente de outras substâncias (tramadol, morfina, codeína, heroína, lança perfume / loló) anterior a internação por COVID-19?**

Sim  Não  Não sabe/Não quer responder

[reset](#)

**Iniciou uso após a internação por COVID-19?**

Sim  Não  Não sabe/Não quer responder

[reset](#)

**Aumentou o uso de alguma outra substância após a internação por COVID-19?**

Sim  Não  Não sabe/Não quer responder

[reset](#)



## Post-Acute Sequelae of Sars-CoV-2 (PASC): protocol for a multidisciplinary prospective observational evaluation of a cohort of patients surviving hospitalization in São Paulo, Brazil

### INTERVIEW GUIDES

#### COGNIÇÃO

|                                                                                              |                                                                                                                                                                                                                                    |
|----------------------------------------------------------------------------------------------|------------------------------------------------------------------------------------------------------------------------------------------------------------------------------------------------------------------------------------|
| <b>Data da avaliação</b>                                                                     | <input type="text"/>  Today D-M-Y                                                                                                                 |
| <b>Tempo (dias) da admissão hospitalar até a realização da avaliação</b>                     | <input type="text"/>                                                                                                                                                                                                               |
| <b>Nome do médico (a) / avaliador (a)</b>                                                    | <input type="text"/> ▼                                                                                                                                                                                                             |
| <b>Formato da avaliação</b>                                                                  | <input type="radio"/> Presencial <input type="radio"/> Teleconsulta <span>reset</span>                                                                                                                                             |
| <b>EQM - ESCALA DE QUEIXA DE MEMÓRIA<br/>FORMA A-PACIENTE RESPONDE</b>                       |                                                                                                                                                                                                                                    |
| <b>Instruções</b>                                                                            | <ul style="list-style-type: none"><li>• Aplique diretamente com o(a) paciente, sem a intervenção do(a) acompanhante.</li><li>• Leia em voz alta e clara</li></ul>                                                                  |
| <b>P1. Você tem problema de memória? (ou "de esquecimento?" ou "dificuldade de memória")</b> | <input type="radio"/> Não <input type="radio"/> Não sabe responder / indeciso / dúvida <input type="radio"/> Sim <span>reset</span><br><small>Se responder <b>Não</b>, marque "Não" também na P2 e na P3 e pule para o P4.</small> |
| <b>P4. Como está sua memória em comparação com a de outras pessoas de sua idade?</b>         | <input type="radio"/> Igual ou melhor <input type="radio"/> Um pouco pior <input type="radio"/> Muito pior <span>reset</span>                                                                                                      |
| <b>P5. Como está sua memória em comparação a logo antes da pandemia?</b>                     | <input type="radio"/> Igual ou melhor <input type="radio"/> Um pouco pior <input type="radio"/> Bem pior <span>reset</span>                                                                                                        |
| <b>P6. Como está sua memória em comparação a quando você era mais jovem?</b>                 | <input type="radio"/> Igual ou melhor <input type="radio"/> Um pouco pior <input type="radio"/> Bem pior <span>reset</span>                                                                                                        |
| <b>P7. Acontece de você esquecer o que acabou de ler ou de ouvir (p.ex., numa conversa)?</b> | <input type="radio"/> Raramente / nunca <input type="radio"/> De vez em quando <input type="radio"/> Frequentemente <span>reset</span>                                                                                             |
| <b>P8. Dê uma nota de 1 a 10 para sua memória, sendo 1 a pior e 10 a melhor.</b>             | <input type="radio"/> 9 ou 10 <input type="radio"/> 5 a 8 <input type="radio"/> 1 a 4 <span>reset</span>                                                                                                                           |
| <b>Escore EQM - Paciente</b>                                                                 | <input type="text"/>                                                                                                                                                                                                               |
| <b>Presença de acompanhante com o paciente?</b>                                              | <input type="radio"/> Não <input type="radio"/> Sim <span>reset</span>                                                                                                                                                             |

Escore EQM - Familiar

## TESTES COGNITIVOS

## a. Orientação Temporal

|                              | Incorreto             | Correto               |                       |
|------------------------------|-----------------------|-----------------------|-----------------------|
| Dia da semana                | <input type="radio"/> | <input type="radio"/> | <a href="#">reset</a> |
| Dia do mês                   | <input type="radio"/> | <input type="radio"/> | <a href="#">reset</a> |
| Mês                          | <input type="radio"/> | <input type="radio"/> | <a href="#">reset</a> |
| Ano                          | <input type="radio"/> | <input type="radio"/> | <a href="#">reset</a> |
| Hora aproximada (+/- 1 hora) | <input type="radio"/> | <input type="radio"/> | <a href="#">reset</a> |

Orientação Temporal - Acertos

## a. Orientação Espacial

|                       | Incorreto             | Correto               |                       |
|-----------------------|-----------------------|-----------------------|-----------------------|
| Local específico      | <input type="radio"/> | <input type="radio"/> | <a href="#">reset</a> |
| Instituição           | <input type="radio"/> | <input type="radio"/> | <a href="#">reset</a> |
| Bairro ou Rua Próxima | <input type="radio"/> | <input type="radio"/> | <a href="#">reset</a> |
| Cidade                | <input type="radio"/> | <input type="radio"/> | <a href="#">reset</a> |
| Estado                | <input type="radio"/> | <input type="radio"/> | <a href="#">reset</a> |

Orientação Espacial - Acertos

Fluência Verbal: ANIMAIS

- Diga ao paciente: "**Vou marcar 1 minuto no relógio, e quero que nesse tempo você me fale o nome de todos os animais que você puder se lembrar. Vale dizer o nome de qualquer bicho ou animal.**"
- Certifique-se de que a pessoa entendeu a instrução. Se necessário, exemplifique: "**se eu estivesse pedindo nomes de frutas, vocêalaria maçã, laranja, etc., entendeu?**"
- Se compreendeu as instruções, diga "**pode começar**". O examinador cronometra 1 minuto e anota as respostas do paciente nesse tempo. Se houver denominações diferentes para um mesmo animal segundo o sexo (boi, vaca, etc), considere as 2 respostas.

O escore final corresponde ao número total de animais lembrados em 1 minuto.

Número de animais em 1 minuto

Quantidade de Erros (palavras não animais)

Perseveração (repetição de animais)



## Post-Acute Sequelae of Sars-CoV-2 (PASC): protocol for a multidisciplinary prospective observational evaluation of a cohort of patients surviving hospitalization in São Paulo, Brazil

### INTERVIEW GUIDES

#### AVALIAÇÃO COMPLEMENTAR

Data da avaliação

 Today D-M-Y

Tempo (dias) da admissão hospitalar até a realização da avaliação

Nome do Avaliador (a)

Endereço/ Moradia/ Suporte Social

Endereço registrado no momento da internação

Logradouro: \_\_\_\_\_, \_\_\_\_\_  
Cidade: \_\_\_\_\_, Estado: \_\_\_\_\_, CEP: \_\_\_\_\_

Confirmar se o endereço permanece o mesmo da internação, ou registrar mudança abaixo:

Expand

Com quem você mora? Resposta dada pelo sujeito ou acompanhante

- Sozinho  
 Familiar ou cuidador formal (considerar também amigo(s) ou companheiro(s))  
 Instituição de longa permanência

reset

Escolaridade

**Observação:** Lembrar que nomenclatura mudou, e devemos garantir que quem coletará a informação sabe disso, ou seja, que o que era primeira série (crianças de 7 anos) agora é segundo ano. O fundamental 1 começa com 6 anos, no primeiro ano (que equivalia ao pré) e vai até o 5º ano, e fundamental 2 vai do sexto ano ao nono ano. Importante termos certeza de que quem aplica o questionário sabe a nomenclatura, em especial para pacientes mais novos. Como o critério de inclusão de pacientes é acima de 18 anos, todos estavam na regra antiga.

Qual seu grau de instrução?

Posição Sócio-Econômica: Critério Brasil 2020

Quais dos itens a seguir existem na sua casa? Para cada item, perguntar a quantidade.

Banheiros

0  1  2  3  4 ou +

reset

Empregados domésticos

0  1  2  3  4 ou +

reset



|                                                                                                                                                                                                                                                                                           |                                                                                                                                                                                                     |                       |
|-------------------------------------------------------------------------------------------------------------------------------------------------------------------------------------------------------------------------------------------------------------------------------------------|-----------------------------------------------------------------------------------------------------------------------------------------------------------------------------------------------------|-----------------------|
| <b>Automóveis</b>                                                                                                                                                                                                                                                                         | <input type="radio"/> 0 <input type="radio"/> 1 <input type="radio"/> 2 <input type="radio"/> 3 <input type="radio"/> 4 ou +                                                                        | <a href="#">reset</a> |
| <b>Microcomputador</b>                                                                                                                                                                                                                                                                    | <input type="radio"/> 0 <input type="radio"/> 1 <input type="radio"/> 2 <input type="radio"/> 3 <input type="radio"/> 4 ou +                                                                        | <a href="#">reset</a> |
| <b>Lava louça</b>                                                                                                                                                                                                                                                                         | <input type="radio"/> 0 <input type="radio"/> 1 <input type="radio"/> 2 <input type="radio"/> 3 <input type="radio"/> 4 ou +                                                                        | <a href="#">reset</a> |
| <b>Geladeira</b>                                                                                                                                                                                                                                                                          | <input type="radio"/> 0 <input type="radio"/> 1 <input type="radio"/> 2 <input type="radio"/> 3 <input type="radio"/> 4 ou +                                                                        | <a href="#">reset</a> |
| <b>Freezer</b>                                                                                                                                                                                                                                                                            | <input type="radio"/> 0 <input type="radio"/> 1 <input type="radio"/> 2 <input type="radio"/> 3 <input type="radio"/> 4 ou +                                                                        | <a href="#">reset</a> |
| <b>Lava roupa</b>                                                                                                                                                                                                                                                                         | <input type="radio"/> 0 <input type="radio"/> 1 <input type="radio"/> 2 <input type="radio"/> 3 <input type="radio"/> 4 ou +                                                                        | <a href="#">reset</a> |
| <b>DVD</b>                                                                                                                                                                                                                                                                                | <input type="radio"/> 0 <input type="radio"/> 1 <input type="radio"/> 2 <input type="radio"/> 3 <input type="radio"/> 4 ou +                                                                        | <a href="#">reset</a> |
| <b>TV</b>                                                                                                                                                                                                                                                                                 | <input type="radio"/> 0 <input type="radio"/> 1 <input type="radio"/> 2 <input type="radio"/> 3 <input type="radio"/> 4 ou +                                                                        | <a href="#">reset</a> |
| <b>Microondas</b>                                                                                                                                                                                                                                                                         | <input type="radio"/> 0 <input type="radio"/> 1 <input type="radio"/> 2 <input type="radio"/> 3 <input type="radio"/> 4 ou +                                                                        | <a href="#">reset</a> |
| <b>Motocicleta</b>                                                                                                                                                                                                                                                                        | <input type="radio"/> 0 <input type="radio"/> 1 <input type="radio"/> 2 <input type="radio"/> 3 <input type="radio"/> 4 ou +                                                                        | <a href="#">reset</a> |
| <b>Secadora de roupas</b>                                                                                                                                                                                                                                                                 | <input type="radio"/> 0 <input type="radio"/> 1 <input type="radio"/> 2 <input type="radio"/> 3 <input type="radio"/> 4 ou +                                                                        | <a href="#">reset</a> |
| <b>Qual o grau de instrução do chefe de família?</b>                                                                                                                                                                                                                                      | <input type="text" value=""/>                                                                                                                                                                       | <a href="#">reset</a> |
| <b>Serviços Públicos</b>                                                                                                                                                                                                                                                                  |                                                                                                                                                                                                     |                       |
| <b>Água encanada</b>                                                                                                                                                                                                                                                                      | <input type="radio"/> Não <input type="radio"/> Sim                                                                                                                                                 | <a href="#">reset</a> |
| <b>Rua pavimentada</b>                                                                                                                                                                                                                                                                    | <input type="radio"/> Não <input type="radio"/> Sim                                                                                                                                                 | <a href="#">reset</a> |
| <b>Classificação Social - Escore</b>                                                                                                                                                                                                                                                      | <input type="text" value=""/>                                                                                                                                                                       |                       |
| <b>Classificação Social - Classe Social</b>                                                                                                                                                                                                                                               | <input type="text" value=""/><br>1= Classe A<br>2= Classe B1<br>3= Classe B2<br>4= Classe C1<br>5= Classe C2<br>6= Classe D-E                                                                       |                       |
| <b>Raça</b>                                                                                                                                                                                                                                                                               |                                                                                                                                                                                                     |                       |
| <b>Raça (O Censo Brasileiro (IBGE) usa os termos 'preta', 'parda', 'branca', 'amarela' e 'indígena' para classificar a cor ou raça das pessoas. Se o(a) Sr(a) tivesse que responder ao Censo do IBGE hoje, como se classificaria a respeito de sua cor ou raça? LEIA AS ALTERNATIVAS)</b> |                                                                                                                                                                                                     |                       |
|                                                                                                                                                                                                                                                                                           | <input type="radio"/> Preta <input type="radio"/> Parda <input type="radio"/> Branca <input type="radio"/> Amarela <input type="radio"/> Indígena <input type="radio"/> Não sabe/não quer responder | <a href="#">reset</a> |
| <b>Histórico Profissional Prévio e Status Ocupacional Atual</b>                                                                                                                                                                                                                           |                                                                                                                                                                                                     |                       |
| <b>Profissão</b>                                                                                                                                                                                                                                                                          | <input type="text" value=""/>                                                                                                                                                                       |                       |

Ocupação antes da internação por COVID-19

Retornou ao status de emprego após a internação?

- Sim, presencialmente  
 Sim, trabalhando de casa / remotamente  
 Não pude ainda retornar  
 Decidi deixar o trabalho  
 Perdi o emprego devido à pandemia  
 Não trabalha atualmente/aposentado  
 Não se aplica

reset

Detalhes adicionais sobre situação ocupacional atual:

- Trabalho em tempo integral  
 Trabalho em meio período  
 Aposentado/pensionista  
 Afastamento por doença/invalidez  
 Desempregado

reset

### Tabagismo

O(a) senhor(a) é ou já foi fumante, ou seja, já fumou pelo menos 100 cigarros (cinco maços de cigarros) ao longo da sua vida?

- Sim  Não  Não sabe/ não quer responder

reset

### Hábitos Alimentares e Peso Corporal

Entrevistador(a): DIGA AO PARTICIPANTE: "Agora vamos conversar sobre seu apetite e peso"

Qual era o seu peso imediatamente antes da internação no HCFMUSP por COVID-19? (Kg)

IMC antes da admissão hospitalar por COVID

Em algum período após a alta da sua internação, o(a) Sr(a) teve alteração na sua ingestão alimentar?

- Sem alteração  Sim

reset

Em algum período durante os 6 meses após a alta da sua internação, o(a) Sr(a) teve perda de apetite que durou mais do que 2 semanas?

- Não  
 Sim  
 Não sabe/ não quer responder

reset

Ao longo dos últimos 6 meses, o(a) Sr(a) teve perda de peso?

- Não  Sim  Não sabe/ não quer responder

reset

Nos **ÚLTIMOS 30 DIAS**, você notou uma diminuição significativa no seu apetite?

- Sim  Não

reset

Nos **ÚLTIMOS 30 DIAS**, você perdeu peso?

- Sim  Não  Não sei

reset

O paciente tem hábito de dieta restritiva? (ex. Vegetariana, Vegana, Celíaca, Mediterrânea)

- Não  Sim  Não sabe/ não quer responder

reset

Nos últimos 12 meses, quanto tempo (dias por semana) você geralmente consumiu os seguintes alimentos:

|        | Nunca                 | Uma vez por semana    | 2-3 vezes por semana  | Uma vez por dia       | Mais de uma vez por dia |
|--------|-----------------------|-----------------------|-----------------------|-----------------------|-------------------------|
| Carnes | <input type="radio"/> | <input type="radio"/> | <input type="radio"/> | <input type="radio"/> | <input type="radio"/>   |

reset

|                                                            |                       |                       |                       |                       |                       |                       |
|------------------------------------------------------------|-----------------------|-----------------------|-----------------------|-----------------------|-----------------------|-----------------------|
| <b>Carnes processadas (ex. Salsicha, Presunto, Salame)</b> | <input type="radio"/> | <input type="radio"/> | <input type="radio"/> | <input type="radio"/> | <input type="radio"/> | <a href="#">reset</a> |
| <b>Carne Vermelha</b>                                      | <input type="radio"/> | <input type="radio"/> | <input type="radio"/> | <input type="radio"/> | <input type="radio"/> | <a href="#">reset</a> |
| <b>Peixe</b>                                               | <input type="radio"/> | <input type="radio"/> | <input type="radio"/> | <input type="radio"/> | <input type="radio"/> | <a href="#">reset</a> |
| <b>Frango</b>                                              | <input type="radio"/> | <input type="radio"/> | <input type="radio"/> | <input type="radio"/> | <input type="radio"/> | <a href="#">reset</a> |
| <b>Carne de Porco</b>                                      | <input type="radio"/> | <input type="radio"/> | <input type="radio"/> | <input type="radio"/> | <input type="radio"/> | <a href="#">reset</a> |
| <b>Frutas e Vegetais</b>                                   | <input type="radio"/> | <input type="radio"/> | <input type="radio"/> | <input type="radio"/> | <input type="radio"/> | <a href="#">reset</a> |
| <b>Grãos (ex. feijão, lentilha)</b>                        | <input type="radio"/> | <input type="radio"/> | <input type="radio"/> | <input type="radio"/> | <input type="radio"/> | <a href="#">reset</a> |

### Questionário Internacional de Exercício Físico (IPAQ)

Para responder as questões lembre que:

- atividades físicas **VIGOROSAS** são aquelas que precisam de um grande esforço físico e que fazem respirar **MUITO** mais forte que o normal
- atividades físicas **MODERADAS** são aquelas que precisam de algum esforço físico e que fazem respirar **UM POUCO** mais forte que o normal

Para responder as perguntas pense somente nas atividades que voce realiza **por pelo menos 10 minutos contínuos** de cada vez:

1a. Em quantos dias de uma semana normal, você realiza atividades **VIGOROSAS** por **pelo menos 10 minutos contínuos**, como por exemplo correr, fazer ginástica aeróbica, jogar futebol, pedalar rapido na bicicleta, jogar basquete, fazer serviços domésticos pesados em casa, no quintal ou no jardim, carregar pesos elevados ou qualquer atividade que faça você suar **BASTANTE** ou aumentem **MUITO** sua respiração ou batimentos do coração.

**Duração da Atividade (1)**

2a. Em quantos dias de uma semana normal, você realiza atividades **MODERADAS** por **pelo menos 10 minutos contínuos**, como por exemplo pedalar leve na bicicleta, nadar, dançar, fazer ginástica aeróbica leve, jogar vôlei recreativo, carregar pesos leves, fazer serviços domésticos na casa, no quintal ou no jardim como varrer, aspirar, cuidar do jardim, ou qualquer atividade que faça você suar leve ou aumentem **moderadamente** sua respiração ou batimentos do coração

**(POR FAVOR NAO INCLUA CAMINHADA)**

**Duração das Atividades (2)**

3a. Em quantos dias de uma semana normal você caminha **por pelo menos 10 minutos contínuos** em casa ou no trabalho, como forma de transporte para ir de um lugar para outro, por lazer, por prazer ou como forma de exercício?

**Duração das Atividades (3)**

4a. Estas últimas perguntas são em relação ao tempo que você gasta sentado ao todo no trabalho, em casa, na escola ou faculdade e durante o tempo livre. Isto inclui o tempo que você gasta sentado no escritório ou estudando, fazendo lição de casa, visitando amigos, lendo e sentado ou deitado assistindo televisão.

Quanto tempo **por dia** você fica sentado em um dia da semana?

**Horas**

Minutos

4b. Quanto tempo **por dia** você fica sentado no final de semana?

Horas

Minutos

#### Classificação do Nível de Atividade Física - IPAQ

Escore IPAQ

Classificação:

- 0 - Sedentário
- 1 - Irregularmente Ativo
- 2 - Ativo
- 3 - Muito Ativo

**SEDENTÁRIO:** aquele que não realizou nenhuma atividade física por pelo menos 10 minutos contínuos durante a semana.

**IRREGULARMENTE ATIVO:** aquele que realiza atividade física, porém, de forma insuficiente para ser classificado como ativo pois não cumpre as recomendações quanto a frequência ou duração. Para realizar essa classificação soma-se a frequência e a duração dos diferentes tipos de atividades (caminhada + moderada + vigorosa).

**ATIVO:** aquele que cumpriu as recomendações de:

- a) VIGOROSA: 3 ou mais dias/semana e 20 ou mais minutos por sessão; ou
- b) MODERADA ou CAMINHADA: 5 ou mais dias/semana e 30 ou mais minutos por sessão; ou
- c) Qualquer atividade somada: 5 ou mais dias/semana e 150 ou mais minutos/semana (caminhada + moderada + vigorosa).

**MUITO ATIVO:** aquele que cumpriu as recomendações de:

- a) VIGOROSA: 5 ou mais dias/semana e 30 ou mais minutos por sessão ou
- b) VIGOROSA: 3 ou mais dias/semana e 20 ou mais minutos por sessão + MODERADA ou CAMINHADA: 5 ou mais dias/semana e 30 ou mais minutos por sessão.

Classificação do Nível de Atividade Física

- Sedentário
- Irregularmente ativo
- Ativo
- Muito ativo

reset

#### Questões Complementares para a Geriatria

#### Repetição de TRÊS palavras

**DIGA AO PARTICIPANTE:** "Agora eu vou dizer três palavras. Escute com atenção, e quando eu terminar, repita as três palavras. Tente memorizá-las porque eu vou perguntar novamente daqui a pouco. As palavras são: "**CARRO, VASO, TIJOLO**".

O entrevistador deve repetir até três vezes para o aprendiz.

Depois do aprendizado, o entrevistador deve cronometrar o número de segundos transcorridos durante a realização das questões abaixo sobre exaustão.

#### Questões sobre EXAUSTÃO

Na última semana, tudo o que eu fiz exigiu um grande esforço:

- Em nenhuma parte do tempo
- Em algum momento (1-2 dias)
- A maior parte do tempo (3-4 dias)
- O tempo todo

reset

Na última semana, eu não consegui concluir o que queria fazer:

- Em nenhuma parte do tempo
- Em algum momento (1-2 dias)
- A maior parte do tempo (3-4 dias)
- O tempo todo

reset

#### Evocação de três palavras

Estima-se que as duas questões acima sobre exaustão tomaram aproximadamente **60 segundos ou um pouco mais**.

Caso estas duas questões tenham sido completadas em tempo menor que 60 segundos, o entrevistador deve aguardar. Ao final do período de latência, o entrevistador deve pedir ao paciente para se lembrar das três palavras que foram memorizadas.

#### Registro - Repetição de palavras

|        | Incorreto             | Correto               |                       |
|--------|-----------------------|-----------------------|-----------------------|
| Vaso   | <input type="radio"/> | <input type="radio"/> | <a href="#">reset</a> |
| Carro  | <input type="radio"/> | <input type="radio"/> | <a href="#">reset</a> |
| Tijolo | <input type="radio"/> | <input type="radio"/> | <a href="#">reset</a> |

Resultado: Evocação de 3 palavras

#### Questões sobre DEPRESSÃO

|                                                                     |                           |                           |                       |
|---------------------------------------------------------------------|---------------------------|---------------------------|-----------------------|
| 1. Você esta satisfeito com a sua vida?                             | <input type="radio"/> Não | <input type="radio"/> Sim | <a href="#">reset</a> |
| 2. Você abandonou muitas das suas atividades e dos seus interesses? | <input type="radio"/> Não | <input type="radio"/> Sim | <a href="#">reset</a> |
| 3. Você se sente feliz a maior parte do tempo?                      | <input type="radio"/> Não | <input type="radio"/> Sim | <a href="#">reset</a> |
| 4. Você prefere ficar em casa em vez de sair e fazer coisas novas?  | <input type="radio"/> Não | <input type="radio"/> Sim | <a href="#">reset</a> |

Pontuação Total

#### BRAZILIAN OARS MULTIDIMENSIONAL FUNCTIONAL ASSESSMENT QUESTIONNAIRE - BOMFAQ

**DIGA AO PARTICIPANTE: "Agora eu gostaria de perguntar sobre algumas atividades e tarefas do seu dia a dia".**  
O (a) Sr. (a) tem alguma dificuldade para:

|                                              |                                 |                                 |                                   |                       |
|----------------------------------------------|---------------------------------|---------------------------------|-----------------------------------|-----------------------|
| Deitar e levantar da cama                    | <input type="radio"/> sem ajuda | <input type="radio"/> com ajuda | <input type="radio"/> nao realiza | <a href="#">reset</a> |
| Comer                                        | <input type="radio"/> sem ajuda | <input type="radio"/> com ajuda | <input type="radio"/> nao realiza | <a href="#">reset</a> |
| Pentear os cabelos                           | <input type="radio"/> sem ajuda | <input type="radio"/> com ajuda | <input type="radio"/> nao realiza | <a href="#">reset</a> |
| Andar no plano                               | <input type="radio"/> sem ajuda | <input type="radio"/> com ajuda | <input type="radio"/> nao realiza | <a href="#">reset</a> |
| Tomar banho                                  | <input type="radio"/> sem ajuda | <input type="radio"/> com ajuda | <input type="radio"/> nao realiza | <a href="#">reset</a> |
| Vestir-se                                    | <input type="radio"/> sem ajuda | <input type="radio"/> com ajuda | <input type="radio"/> nao realiza | <a href="#">reset</a> |
| Ir ao banheiro em tempo (manter continencia) | <input type="radio"/> sem ajuda | <input type="radio"/> com ajuda | <input type="radio"/> nao realiza | <a href="#">reset</a> |
| Subir um lance de escadas                    | <input type="radio"/> sem ajuda | <input type="radio"/> com ajuda | <input type="radio"/> nao realiza | <a href="#">reset</a> |
| Tomar os remédios no horário                 | <input type="radio"/> sem ajuda | <input type="radio"/> com ajuda | <input type="radio"/> nao realiza | <a href="#">reset</a> |
| Andar perto de casa                          | <input type="radio"/> sem ajuda | <input type="radio"/> com ajuda | <input type="radio"/> nao realiza | <a href="#">reset</a> |

|                                |                                 |                                 |                                   |                       |
|--------------------------------|---------------------------------|---------------------------------|-----------------------------------|-----------------------|
| <b>Fazer as compras</b>        | <input type="radio"/> sem ajuda | <input type="radio"/> com ajuda | <input type="radio"/> nao realiza | <a href="#">reset</a> |
| <b>Preparar as refeicoes</b>   | <input type="radio"/> sem ajuda | <input type="radio"/> com ajuda | <input type="radio"/> nao realiza | <a href="#">reset</a> |
| <b>Cortar as unhas dos pes</b> | <input type="radio"/> sem ajuda | <input type="radio"/> com ajuda | <input type="radio"/> nao realiza | <a href="#">reset</a> |
| <b>Sair de condução</b>        | <input type="radio"/> sem ajuda | <input type="radio"/> com ajuda | <input type="radio"/> nao realiza | <a href="#">reset</a> |
| <b>Fazer a limpeza da casa</b> | <input type="radio"/> sem ajuda | <input type="radio"/> com ajuda | <input type="radio"/> nao realiza | <a href="#">reset</a> |
| <b>BOMFAQ - Escore</b>         | <input type="text"/>            |                                 |                                   |                       |

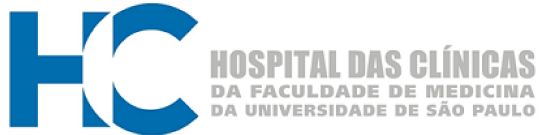

Post-Acute Sequelae of Sars-CoV-2 (PASC): protocol for a multidisciplinary prospective observational evaluation of a cohort of patients surviving hospitalization in São Paulo, Brazil

INTERVIEW GUIDES

TOMOGRAFIA DE TORAX

Data da tomografia de tórax


D-M-Y

Tempo (dias) da admissão hospitalar até a realização do exame

Achados da Tomografia de Tórax

|                                    | Não                   | sim                   |                       |
|------------------------------------|-----------------------|-----------------------|-----------------------|
| Consolidação                       | <input type="radio"/> | <input type="radio"/> | <a href="#">reset</a> |
| Vidro fosco                        | <input type="radio"/> | <input type="radio"/> | <a href="#">reset</a> |
| Atenuação em mosaico               | <input type="radio"/> | <input type="radio"/> | <a href="#">reset</a> |
| Opacidade perilobular              | <input type="radio"/> | <input type="radio"/> | <a href="#">reset</a> |
| Atelectasias                       | <input type="radio"/> | <input type="radio"/> | <a href="#">reset</a> |
| Reticulado                         | <input type="radio"/> | <input type="radio"/> | <a href="#">reset</a> |
| Distorção arquitetural             | <input type="radio"/> | <input type="radio"/> | <a href="#">reset</a> |
| Faveolamento                       | <input type="radio"/> | <input type="radio"/> | <a href="#">reset</a> |
| Bronquiectasia de tração           | <input type="radio"/> | <input type="radio"/> | <a href="#">reset</a> |
| Espessamento de paredes brônquicas | <input type="radio"/> | <input type="radio"/> | <a href="#">reset</a> |
| Pneumatoceles                      | <input type="radio"/> | <input type="radio"/> | <a href="#">reset</a> |
| Derrame pleural                    | <input type="radio"/> | <input type="radio"/> | <a href="#">reset</a> |
| Outros (descrever abaixo)          | <input type="radio"/> | <input type="radio"/> | <a href="#">reset</a> |

Quantificação Visual

|     | 0                     | 1                     | 2                     | 3                     | 4                     | 5                     |                       |
|-----|-----------------------|-----------------------|-----------------------|-----------------------|-----------------------|-----------------------|-----------------------|
| LSD | <input type="radio"/> | <input type="radio"/> | <input type="radio"/> | <input type="radio"/> | <input type="radio"/> | <input type="radio"/> | <a href="#">reset</a> |
| LM  | <input type="radio"/> | <input type="radio"/> | <input type="radio"/> | <input type="radio"/> | <input type="radio"/> | <input type="radio"/> | <a href="#">reset</a> |
| LID | <input type="radio"/> | <input type="radio"/> | <input type="radio"/> | <input type="radio"/> | <input type="radio"/> | <input type="radio"/> | <a href="#">reset</a> |
| LSE | <input type="radio"/> | <input type="radio"/> | <input type="radio"/> | <input type="radio"/> | <input type="radio"/> | <input type="radio"/> | <a href="#">reset</a> |
| LIE | <input type="radio"/> | <input type="radio"/> | <input type="radio"/> | <input type="radio"/> | <input type="radio"/> | <input type="radio"/> | <a href="#">reset</a> |

Escore total

Quantificação Automática

|                  |                                  |
|------------------|----------------------------------|
| <b>LSD (%)</b>   | <input type="text"/><br>0 - 100% |
| <b>LM (%)</b>    | <input type="text"/><br>0 - 100% |
| <b>LID (%)</b>   | <input type="text"/><br>0 - 100% |
| <b>LSE (%)</b>   | <input type="text"/><br>0 - 100% |
| <b>LIE (%)</b>   | <input type="text"/><br>0 - 100% |
| <b>Total (%)</b> | <input type="text"/><br>0 - 100% |
| <b>HAA (%)</b>   | <input type="text"/><br>0 - 100% |
|                  |                                  |





**Post-Acute Sequelae of Sars-CoV-2 (PASC): protocol for a multidisciplinary prospective observational evaluation of a cohort of patients surviving hospitalization in São Paulo, Brazil**

**INTERVIEW GUIDES**

**ELETROCARDIOGRAMA**

**Eletrocardiograma**

|                                  |                                                                                                                                                                                                                                                                                                                                                                                                                                                                  |                              |                                                                                                                                                                                              |
|----------------------------------|------------------------------------------------------------------------------------------------------------------------------------------------------------------------------------------------------------------------------------------------------------------------------------------------------------------------------------------------------------------------------------------------------------------------------------------------------------------|------------------------------|----------------------------------------------------------------------------------------------------------------------------------------------------------------------------------------------|
| Data do ECG                      | <input type="text"/> Today D-M-Y                                                                                                                                                                                                                                                                                                                                                                                                                                 | Tempo até o ECG (dias)       | <input type="text"/>                                                                                                                                                                         |
| Ritmo cardíaco                   | <input type="radio"/> Sinusal<br><input type="radio"/> Taquicardia Atrial<br><input type="radio"/> Taquicardia Juncional<br><input type="radio"/> Fibrilação Atrial<br><input type="radio"/> Flutter Atrial<br><input type="radio"/> Ritmo Juncional<br><input type="radio"/> Ritmo Ectópico Atrial<br><span style="float: right;">reset</span>                                                                                                                  | Frequência cardíaca          | <input type="text"/>                                                                                                                                                                         |
| Bloqueios de Ramos ou Condução   | <input type="checkbox"/> Bloqueio de Ramo direito<br><input type="checkbox"/> Bloqueio de Ramo esquerdo<br><input type="checkbox"/> Bloqueio divisional Antero-superior<br><input type="checkbox"/> Bloqueio divisional Antero-medial<br><input type="checkbox"/> Bloqueio divisional Pósteroinferior<br><input type="checkbox"/> Distúrbio de condução intraventricular<br><input type="checkbox"/> Atraso final de condução<br><input type="checkbox"/> Nenhum | Bloqueios Atrioventriculares | <input type="checkbox"/> BAV 1o<br><input type="checkbox"/> BAV Mobitz 1<br><input type="checkbox"/> BAV Mobitz 2<br><input type="checkbox"/> BAV 3o grau<br><input type="checkbox"/> Nenhum |
| Extrasístoles supraventriculares | <input type="text"/> ▼                                                                                                                                                                                                                                                                                                                                                                                                                                           | Núm. extrasístoles           | <input type="text"/>                                                                                                                                                                         |
| Extrasístoles ventriculares      | <input type="text"/> ▼                                                                                                                                                                                                                                                                                                                                                                                                                                           | Núm. extrasístoles           | <input type="text"/>                                                                                                                                                                         |
| Área elétrica inativa            | <input type="text"/> ▼                                                                                                                                                                                                                                                                                                                                                                                                                                           | Regiões                      | <input type="text"/>                                                                                                                                                                         |
| Inversão de Onda T               | <input type="text"/> ▼                                                                                                                                                                                                                                                                                                                                                                                                                                           | Regiões                      | <input type="text"/>                                                                                                                                                                         |
| Infradesnivelamento de ST        | <input type="text"/> ▼                                                                                                                                                                                                                                                                                                                                                                                                                                           | Regiões                      | <input type="text"/>                                                                                                                                                                         |

**Duração**

|                       |                      |                 |                      |
|-----------------------|----------------------|-----------------|----------------------|
| Onda P (ms)           | <input type="text"/> | PR (ms)         | <input type="text"/> |
| QRS (ms)              | <input type="text"/> | QT (ms)         | <input type="text"/> |
| RR (ms)               | <input type="text"/> | QTc (ms)        | <input type="text"/> |
| T pico - T final (ms) | <input type="text"/> | Local da medida | <input type="text"/> |

**Eixo**

|        |                      |     |                      |        |                      |
|--------|----------------------|-----|----------------------|--------|----------------------|
| Onda P | <input type="text"/> | QRS | <input type="text"/> | Onda T | <input type="text"/> |
|--------|----------------------|-----|----------------------|--------|----------------------|

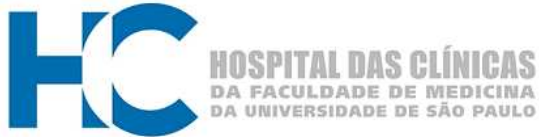

**Post-Acute Sequelae of Sars-CoV-2 (PASC): protocol for a multidisciplinary prospective observational evaluation of a cohort of patients surviving hospitalization in São Paulo, Brazil**

**INTERVIEW GUIDES**

**PESQUISA DE SATISFAÇÃO**

Gostaríamos de ouvir a sua opinião sobre as avaliações que foram realizadas hoje. Por favor, para cada uma das perguntas, escolha o número que melhor indica a sua opinião.

Indique o quanto as avaliações de hoje deixaram você cansado, escolhendo o número que melhor indica o seu nível de cansaço.

1  2  3  4  5  6  7  8  9  10

[reset](#)

Indique o quanto o período de avaliações de hoje foi agradável ou desagradável, escolhendo o número que melhor indica como você se sentiu.

1  2  3  4  5  6  7  8  9  10

[reset](#)

No futuro, você estaria disposto a participar novamente de uma atividade de pesquisa como a de hoje? Escolha o número que melhor indica o seu nível de disposição.

1  2  3  4  5  6  7  8  9  10

[reset](#)

Qual é o seu nível de satisfação com o atendimento que foi realizado?

1  2  3  4  5  6  7  8  9  10

[reset](#)

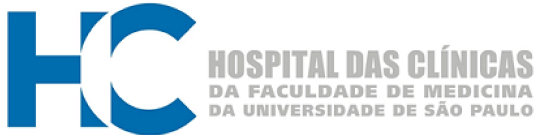

Post-Acute Sequelae of Sars-CoV-2 (PASC): protocol for a multidisciplinary prospective observational evaluation of a cohort of patients surviving hospitalization in São Paulo, Brazil

INTERVIEW GUIDES

FUNÇÃO PULMONAR

ERGOESPIROMETRIA

|                                                               |                                                                                                                    |
|---------------------------------------------------------------|--------------------------------------------------------------------------------------------------------------------|
| Data do exame                                                 | <input type="text"/>  Today D-M-Y |
| Tempo (dias) da admissão hospitalar até a realização do exame | <input type="text"/>                                                                                               |
| VO2 pico absoluto (mL/min)                                    | <input type="text"/>                                                                                               |
| VO2 pico absoluto (mL/Kg.min)                                 | <input type="text"/>                                                                                               |
| VO2 pico (%)                                                  | <input type="text"/>                                                                                               |
| Carga pico absoluto (W)                                       | <input type="text"/>                                                                                               |
| Carga pico (%)                                                | <input type="text"/>                                                                                               |
| RER pico                                                      | <input type="text"/>                                                                                               |
| FC pico absoluto (bpm)                                        | <input type="text"/>                                                                                               |
| FC pico (%)                                                   | <input type="text"/>                                                                                               |
| Reserva cronotrópica (%)                                      | <input type="text"/>                                                                                               |
| Pulso O2 pico absoluto (mL/bat)                               | <input type="text"/>                                                                                               |
| Pulso O2 pico (%)                                             | <input type="text"/>                                                                                               |
| Volume Corrente pico                                          | <input type="text"/>                                                                                               |
| Frequência Respiratória pico                                  | <input type="text"/>                                                                                               |
| Reserva Ventilatória                                          | <input type="text"/>                                                                                               |
| spO2 basal                                                    | <input type="text"/>                                                                                               |
| spO2 pico                                                     | <input type="text"/>                                                                                               |
| VE-VCO2 slope                                                 | <input type="text"/>                                                                                               |

|                                     |                      |
|-------------------------------------|----------------------|
| <b>VE/VO2 Nadir</b>                 | <input type="text"/> |
| <b>VO2/Carga slope</b>              | <input type="text"/> |
| <b>FC/VO2 slope</b>                 | <input type="text"/> |
| <b>VT/LnVE slope</b>                | <input type="text"/> |
| <b>Borg MMII repouso</b>            | <input type="text"/> |
| <b>Borg MMII pico</b>               | <input type="text"/> |
| <b>Borg dispnea repouso</b>         | <input type="text"/> |
| <b>Borg dispnea pico</b>            | <input type="text"/> |
| <b>PLETISMOGRAFIA</b>               |                      |
| <b>CPT (L)</b>                      | <input type="text"/> |
| <b>CPT (%)</b>                      | <input type="text"/> |
| <b>VR (L)</b>                       | <input type="text"/> |
| <b>VR (%)</b>                       | <input type="text"/> |
| <b>VR/CPT</b>                       | <input type="text"/> |
| <b>CRF (L)</b>                      | <input type="text"/> |
| <b>CRF (%)</b>                      | <input type="text"/> |
| <b>sRaw absoluto</b>                | <input type="text"/> |
| <b>DL_co (mL/min.mmHg)</b>          | <input type="text"/> |
| <b>DL_co (%)</b>                    | <input type="text"/> |
| <b>VA (L)</b>                       | <input type="text"/> |
| <b>Kco absoluto (mL/min.mmHg/L)</b> | <input type="text"/> |
|                                     |                      |

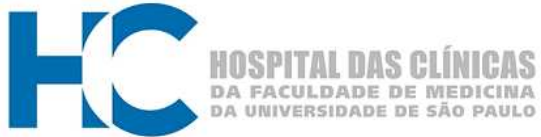

Post-Acute Sequelae of Sars-CoV-2 (PASC): protocol for a multidisciplinary prospective observational evaluation of a cohort of patients surviving hospitalization in São Paulo, Brazil

INTERVIEW GUIDES

BIOBANCO

| TCLE Biobanco                                                                |                                                                                                                                                                                     |
|------------------------------------------------------------------------------|-------------------------------------------------------------------------------------------------------------------------------------------------------------------------------------|
| Paciente assinou TCLE do Biobanco?                                           | <input type="radio"/> Não <input type="radio"/> Sim <a href="#">reset</a>                                                                                                           |
| Momento da assinatura do TCLE                                                | <input type="radio"/> Hospitalização (T0)<br><input type="radio"/> Na visita de 6 meses<br><input type="radio"/> Em ambos os momentos <a href="#">reset</a>                         |
| Paciente tem amostras no biobanco?                                           | <input type="radio"/> Não <input type="radio"/> Sim <a href="#">reset</a>                                                                                                           |
| Paciente autorizou o armazenamento das amostras?                             | <input type="radio"/> Não <input type="radio"/> Sim <input type="radio"/> Não disponível <a href="#">reset</a>                                                                      |
| Deseja ser consultado todas as vezes que o biobanco for usar alguma amostra? | <input type="radio"/> Não<br><input type="radio"/> Sim<br><input type="radio"/> Prefere que outra pessoa o represente<br><input type="radio"/> Não disponível <a href="#">reset</a> |
| Lista da Dra Leslie                                                          | <input type="radio"/> Não <input type="radio"/> Sim <a href="#">reset</a>                                                                                                           |
| SORO                                                                         |                                                                                                                                                                                     |
| Amostras - SORO                                                              | <input type="radio"/> Não <input type="radio"/> Sim <a href="#">reset</a>                                                                                                           |
| PLASMA                                                                       |                                                                                                                                                                                     |
| Amostras - PLASMA                                                            | <input type="radio"/> Não <input type="radio"/> Sim <a href="#">reset</a>                                                                                                           |



Post-Acute Sequelae of Sars-CoV-2 (PASC): protocol for a multidisciplinary prospective observational evaluation of a cohort of patients surviving hospitalization in São Paulo, Brazil

INTERVIEW GUIDES

EXAMES LABORATORIAIS - 6M

Data da consulta: \_\_\_\_\_

Considerar exames realizados -30/+30 dias desta data.

Exames Laboratoriais (6m)

Data da coleta dos exames

  Today D-M-Y

Tempo (dias) da admissão hospitalar até a realização do exame laboratorial

Alanina aminotransferase (ALT)

Albumina (Eletroforese de proteínas)

Por favor, utilize o ponto como separador de casa decimal.

Aspartato aminotransferase (AST)

Cálcio iônico

Por favor, utilize o ponto como separador de casa decimal.

Cálcio total

Por favor, utilize o ponto como separador de casa decimal.

Cloro

Colesterol total

Creatinina

Por favor, utilize o ponto como separador de casa decimal.

Creatinina urinária

Creatino Fosfoquinase (CPK)

Desidrogenase Lactica (DHL)

Dimero D

Ferritina

Ferro sérico

|                                         |                                                                                                   |
|-----------------------------------------|---------------------------------------------------------------------------------------------------|
| <b>Fibrinogênio</b>                     | <input type="text"/>                                                                              |
| <b>Fosfatase alcalina</b>               | <input type="text"/>                                                                              |
| <b>Fósforo</b>                          | <input type="text"/><br><small>Por favor, utilize o ponto como separador de casa decimal.</small> |
| <b>Gama glutamiltransferase (GGT)</b>   | <input type="text"/>                                                                              |
| <b>Glicose</b>                          | <input type="text"/>                                                                              |
| <b>HDL</b>                              | <input type="text"/>                                                                              |
| <b>Hemoglobina glicada</b>              | <input type="text"/><br><small>Por favor, utilize o ponto como separador de casa decimal.</small> |
| <b>Hemoglobina (g/dL)</b>               | <input type="text"/><br><small>Por favor, utilize o ponto como separador de casa decimal.</small> |
| <b>Hematocrito (%)</b>                  | <input type="text"/>                                                                              |
| <b>VCM</b>                              | <input type="text"/>                                                                              |
| <b>Leucocitos (mm<sup>3</sup>)</b>      | <input type="text"/><br><small>Por favor, utilize o ponto como separador de casa decimal.</small> |
| <b>Linfocitos (mm<sup>3</sup>)</b>      | <input type="text"/><br><small>Por favor, utilize o ponto como separador de casa decimal.</small> |
| <b>Hormonio Tireo-estimulante (TSH)</b> | <input type="text"/><br><small>Por favor, utilize o ponto como separador de casa decimal.</small> |
| <b>Insulina (mU/L)</b>                  | <input type="text"/>                                                                              |
| <b>Lactato venoso</b>                   | <input type="text"/>                                                                              |
| <b>LDL</b>                              | <input type="text"/>                                                                              |
| <b>Lipase (U/L)</b>                     | <input type="text"/>                                                                              |
| <b>Magnésio</b>                         | <input type="text"/><br><small>Por favor, utilize o ponto como separador de casa decimal.</small> |
| <b>NTproBNP (pg/mL)</b>                 | <input type="text"/>                                                                              |
| <b>Peptídeo C (ng/ml)</b>               | <input type="text"/>                                                                              |
| <b>Plaquetas</b>                        | <input type="text"/>                                                                              |
| <b>Potássio</b>                         | <input type="text"/><br><small>Por favor, utilize o ponto como separador de casa decimal.</small> |
| <b>Proteína C Reativa (PCR)</b>         | <input type="text"/>                                                                              |

|                                                       |                                                                                    |                                                            |
|-------------------------------------------------------|------------------------------------------------------------------------------------|------------------------------------------------------------|
| <b>Proteína total (Eletroforese de proteínas)</b>     | <input type="text"/>                                                               |                                                            |
|                                                       |                                                                                    | Por favor, utilize o ponto como separador de casa decimal. |
| <b>Sódio</b>                                          | <input type="text"/>                                                               |                                                            |
| <b>Tempo de Protrombina</b>                           | <input type="text"/>                                                               |                                                            |
| <b>Tempo de Tromboplastina Parcial Ativada (TTPA)</b> | <input type="text"/>                                                               |                                                            |
| <b>Tiroxina Livre (T4 livre)</b>                      | <input type="text"/>                                                               |                                                            |
|                                                       |                                                                                    | Por favor, utilize o ponto como separador de casa decimal. |
| <b>Triglicérides</b>                                  | <input type="text"/>                                                               |                                                            |
| <b>Troponina T ultrasensível (ng/mL)</b>              | <input type="text"/>                                                               |                                                            |
| <b>Ureia</b>                                          | <input type="text"/>                                                               |                                                            |
| <b>Índice de saturação da transferrina</b>            | <input type="text"/>                                                               |                                                            |
| <b>Saturação do ferro (%)</b>                         | <input type="text"/>                                                               |                                                            |
| <b>Urina tipo I</b>                                   |                                                                                    |                                                            |
| <b>pH - Urina</b>                                     | <input type="text"/>                                                               |                                                            |
| <b>Densidade - Urina</b>                              | <input type="text"/>                                                               |                                                            |
| <b>Corpos cetônicos - Urina (g/L)</b>                 | <input type="radio"/> Ausente <input type="radio"/> Presente                       | reset                                                      |
|                                                       | Normal= Ausente                                                                    |                                                            |
| <b>Proteínas - Urina (g/L)</b>                        | <input type="radio"/> Ausente <input type="radio"/> Presente                       | reset                                                      |
|                                                       | Normal= inferior a 0.10 g/L                                                        |                                                            |
| <b>Glicose - Urina (g/L)</b>                          | <input type="radio"/> Ausente <input type="radio"/> Presente                       | reset                                                      |
|                                                       | Normal= Ausente                                                                    |                                                            |
| <b>Nitrito - Urina</b>                                | <input type="radio"/> Ausente <input type="radio"/> Presente                       | reset                                                      |
|                                                       | Normal= Negativo                                                                   |                                                            |
| <b>Leucócitos - Urina</b>                             | <input type="text"/>                                                               |                                                            |
|                                                       | Normal= 8000/mL                                                                    |                                                            |
| <b>Eritrócitos - Urina</b>                            | <input type="text"/>                                                               |                                                            |
|                                                       | Normal= 5000/mL                                                                    |                                                            |
| <b>Cilindros - Urina</b>                              | <input type="radio"/> Ausente <input type="radio"/> Presente                       | reset                                                      |
|                                                       | Hialinos até 110/mL                                                                |                                                            |
| <b>Cristais - Urina</b>                               | <input type="radio"/> Ausente <input type="radio"/> Presente                       | reset                                                      |
|                                                       | Normal= Ausente                                                                    |                                                            |
| <b>Exames faltantes</b>                               | <input type="radio"/> Não foram coletados <input type="radio"/> Material coagulado | reset                                                      |
